# Supplementary material for: Joint genetic control of isoflavones and soyasaponins revealed by mGWAS, genomic prediction, and SHAP-guided allele stacking
Source: Research Square preprint supplement (doi:10.21203/rs.3.rs-8256309/v1), 2026-02-03
Supplement: Supplementary file 1 [file 3d33e6fef2b1ee67b1c99ed5.docx]

Supplementary Figure S1. Relationship between total isoflavone and total soyasaponin content across 376 soybean accessions. Each point represents one accession from the Korean soybean core collection. Total isoflavone content (sum of 12 profiled compounds) is plotted on the x-axis, and total soyasaponin content (sum of five profiled saponins) is plotted on the y-axis. The red line indicates the fitted linear regression describing the positive association between the two metabolite classes. Together, the plot illustrates that despite distinct biosynthetic pathways, total isoflavone and soyasaponin accumulation exhibit coordinated variation at the population level.

Supplementary Figure S2. Multi-step candidate gene identification for a representative GWAS locus. (a) Regional Manhattan plot and LD heatmap surrounding the lead SNP, showing the extent of the associated LD block. (b) Boxplots showing phenotype distributions across haplotypes defined by SNP variation within the locus. (c) Haplotype structure and SNP positions mapped onto the focal gene models; colors indicate allelic states for each accession. (d) Gene co-expression network derived from public soybean transcriptome datasets (ATTED-II). The green node represents the candidate gene, and red nodes indicate co-expressed genes previously implicated in flavonoid biosynthesis. Node labels correspond to Entrez Gene IDs. (e) Functional enrichment analysis of the co-expression network, displaying significantly enriched biological processes and pathways (–log10 P value).
