# Supplementary material for: Joint genetic control of isoflavones and soyasaponins revealed by mGWAS, genomic prediction, and SHAP-guided allele stacking
Source: Research Square preprint supplement (doi:10.21203/rs.3.rs-8256309/v1), 2026-02-03
Supplement: Supplementary file 2 [file b2de1b4e422f79f7c921c795.xlsx]

## Sheet: Table S1
Supplementary Table S1. Presence–absence associations between isoflavones and soyasaponins.
isoflavone	soyasaponin	odds_ratio	pvalue	FDR
Acetyl_daidzin	Soyasaponin_aa	0	0.208596	0.669795
Acetyl_daidzin	Soyasaponin_ab	Inf	0.194255	0.669795
Acetyl_daidzin	Soyasaponin_ba	Inf	0.551447	1
Acetyl_daidzin	Soyasaponin_bb_prime	0	1	1
Acetyl_daidzin	Soyasaponin_bb	0	1	1
Daidzin	Soyasaponin_aa	0.830204	0.711392	1
Daidzin	Soyasaponin_ab	1.29243	0.577407	1
Daidzin	Soyasaponin_ba	3.88495	0.00624084	0.0936126
Daidzin	Soyasaponin_bb_prime	4.54714	0.000177985	0.00533954
Daidzin	Soyasaponin_bb	0	1	1
Genistin	Soyasaponin_aa	0.576492	0.322839	0.88047
Genistin	Soyasaponin_ab	1.85585	0.223265	0.669795
Genistin	Soyasaponin_ba	3.99533	0.0645272	0.387163
Genistin	Soyasaponin_bb_prime	2.82066	0.0508992	0.387163
Genistin	Soyasaponin_bb	0	1	1
Glycitin	Soyasaponin_aa	1.01222	1	1
Glycitin	Soyasaponin_ab	0.908516	0.713161	1
Glycitin	Soyasaponin_ba	1.04164	0.89749	1
Glycitin	Soyasaponin_bb_prime	0.980052	1	1
Glycitin	Soyasaponin_bb	0	0.0530638	0.387163
Malonyl_daidzin	Soyasaponin_aa	0	0.457447	0.980243
Malonyl_daidzin	Soyasaponin_ab	Inf	0.441489	0.980243
Malonyl_daidzin	Soyasaponin_ba	Inf	1	1
Malonyl_daidzin	Soyasaponin_bb_prime	Inf	0.170213	0.669795
Malonyl_daidzin	Soyasaponin_bb	0	1	1
Malonyl_glycitin	Soyasaponin_aa	1.10053	0.675342	1
Malonyl_glycitin	Soyasaponin_ab	0.928172	0.752633	1
Malonyl_glycitin	Soyasaponin_ba	1.15531	0.580508	1
Malonyl_glycitin	Soyasaponin_bb_prime	0.778554	0.404551	0.980243
Malonyl_glycitin	Soyasaponin_bb	0	0.173702	0.669795

## Sheet: Table S2
Supplementary Table S2. Significant SNPs associated with isoflavonoid metabolites.
Metabolite	SNP	CHR	Position	P_value	GWAS method
Acetyl daidzin	Chr01:11567692:C:T	1	11567692	9.54e-19	FarmCPU
Acetyl daidzin	Chr01:25189106:A:G	1	25189106	9.54e-19	FarmCPU
Acetyl daidzin	Chr01:27380498:C:T	1	27380498	9.54e-19	FarmCPU
Acetyl daidzin	Chr01:2918294:C:T	1	2918294	9.54e-19	FarmCPU
Acetyl daidzin	Chr01:33163393:A:G	1	33163393	9.54e-19	FarmCPU
Acetyl daidzin	Chr01:34593642:A:G	1	34593642	9.54e-19	FarmCPU
Acetyl daidzin	Chr01:35865390:A:G	1	35865390	9.54e-19	FarmCPU
Acetyl daidzin	Chr01:3688232:A:G	1	3688232	9.54e-19	FarmCPU
Acetyl daidzin	Chr01:43566183:A:G	1	43566183	9.54e-19	FarmCPU
Acetyl daidzin	Chr01:4742374:A:C	1	4742374	9.54e-19	FarmCPU
Acetyl daidzin	Chr01:754814:C:G	1	754814	9.54e-19	FarmCPU
Acetyl daidzin	Chr01:7565616:A:G	1	7565616	9.54e-19	FarmCPU
Acetyl daidzin	Chr01:9739249:A:G	1	9739249	9.54e-19	FarmCPU
Acetyl daidzin	Chr02:4371582:C:T	2	4371582	9.54e-19	FarmCPU
Acetyl daidzin	Chr03:27373007:C:T	3	27373007	9.54e-19	FarmCPU
Acetyl daidzin	Chr03:41481449:A:T	3	41481449	9.54e-19	FarmCPU
Acetyl daidzin	Chr04:2240055:G:T	4	2240055	9.54e-19	FarmCPU
Acetyl daidzin	Chr04:37087005:C:T	4	37087005	9.54e-19	FarmCPU
Acetyl daidzin	Chr05:3376030:C:G	5	3376030	9.54e-19	FarmCPU
Acetyl daidzin	Chr05:3388138:A:T	5	3388138	6.8e-09	FarmCPU
Acetyl daidzin	Chr07:37358480:A:G	7	37358480	9.54e-17	FarmCPU
Acetyl daidzin	Chr08:184634:A:G	8	184634	9.54e-19	FarmCPU
Acetyl daidzin	Chr08:477602:C:T	8	477602	9.54e-19	FarmCPU
Acetyl daidzin	Chr09:934443:A:C	9	934443	1.14e-09	FarmCPU
Acetyl daidzin	Chr09:986453:A:T	9	986453	9.54e-19	FarmCPU
Acetyl daidzin	Chr13:19501606:C:T	13	19501606	9.54e-19	FarmCPU
Acetyl daidzin	Chr13:777999:A:G	13	777999	5.04e-08	FarmCPU
Acetyl daidzin	Chr13:869319:C:T	13	869319	3.92e-08	FarmCPU
Acetyl daidzin	Chr14:16731540:A:C	14	16731540	9.54e-19	FarmCPU
Acetyl daidzin	Chr15:18731695:A:G	15	18731695	9.54e-19	FarmCPU
Acetyl daidzin	Chr15:42440950:A:G	15	42440950	7.34e-11	FarmCPU
Acetyl daidzin	Chr16:33955844:C:G	16	33955844	6.74e-09	FarmCPU
Acetyl daidzin	Chr16:973494:A:G	16	973494	9.54e-19	FarmCPU
Acetyl daidzin	Chr17:2181278:A:G	17	2181278	2.08e-08	FarmCPU
Acetyl daidzin	Chr17:41209151:A:G	17	41209151	4.22e-08	FarmCPU
Acetyl daidzin	Chr18:2885208:A:G	18	2885208	1.48e-08	FarmCPU
Acetyl daidzin	Chr18:36393119:C:T	18	36393119	6.75e-11	FarmCPU
Acetyl daidzin	Chr18:49288456:A:G	18	49288456	9.54e-19	FarmCPU
Acetyl daidzin	Chr20:23807775:C:T	20	23807775	1.5e-08	FarmCPU
Acetyl daidzin	Chr01:33070162:A:G	1	33070162	2.33e-09	MLM
Acetyl daidzin	Chr01:35870925:C:T	1	35870925	1.89e-08	MLM
Acetyl daidzin	Chr01:35902951:C:G	1	35902951	4.84e-08	MLM
Acetyl daidzin	Chr01:36009539:C:T	1	36009539	1.55e-09	MLM
Acetyl daidzin	Chr01:36922419:A:G	1	36922419	1.83e-08	MLM
Acetyl daidzin	Chr01:36967372:A:G	1	36967372	1.83e-08	MLM
Acetyl daidzin	Chr01:41101215:A:G	1	41101215	2.66e-22	MLM
Acetyl daidzin	Chr01:42899424:C:T	1	42899424	1.35e-13	MLM
Acetyl daidzin	Chr01:4742374:A:C	1	4742374	2.02e-12	MLM
Acetyl daidzin	Chr01:49219023:A:G	1	49219023	2.34e-13	MLM
Acetyl daidzin	Chr01:8139098:A:G	1	8139098	8.3e-91	MLM
Acetyl daidzin	Chr02:211469:A:G	2	211469	5.26e-14	MLM
Acetyl daidzin	Chr02:240649:A:G	2	240649	5.74e-14	MLM
Acetyl daidzin	Chr02:3103043:C:T	2	3103043	1.09e-08	MLM
Acetyl daidzin	Chr02:316227:A:C	2	316227	8.3e-36	MLM
Acetyl daidzin	Chr02:31669951:C:T	2	31669951	2.99e-10	MLM
Acetyl daidzin	Chr02:325283:C:T	2	325283	2.05e-08	MLM
Acetyl daidzin	Chr02:41939183:A:G	2	41939183	7.25e-22	MLM
Acetyl daidzin	Chr02:4371582:C:T	2	4371582	2.02e-12	MLM
Acetyl daidzin	Chr02:5543932:A:C	2	5543932	2.9e-13	MLM
Acetyl daidzin	Chr02:627205:A:G	2	627205	1.04e-08	MLM
Acetyl daidzin	Chr02:8469092:C:T	2	8469092	8.3e-91	MLM
Acetyl daidzin	Chr02:971910:A:G	2	971910	7.41e-11	MLM
Acetyl daidzin	Chr03:10408962:C:T	3	10408962	2.44e-08	MLM
Acetyl daidzin	Chr03:13331959:A:G	3	13331959	2.39e-10	MLM
Acetyl daidzin	Chr03:14190652:G:T	3	14190652	3.14e-09	MLM
Acetyl daidzin	Chr03:14530455:C:T	3	14530455	2.39e-10	MLM
Acetyl daidzin	Chr03:15165027:A:C	3	15165027	1.31e-14	MLM
Acetyl daidzin	Chr03:16357181:A:T	3	16357181	3.23e-09	MLM
Acetyl daidzin	Chr03:16837425:A:G	3	16837425	1.11e-08	MLM
Acetyl daidzin	Chr03:17066801:C:T	3	17066801	8.76e-09	MLM
Acetyl daidzin	Chr03:17750096:A:G	3	17750096	4.62e-13	MLM
Acetyl daidzin	Chr03:2298483:A:T	3	2298483	1.92e-08	MLM
Acetyl daidzin	Chr03:2585402:C:T	3	2585402	3.04e-20	MLM
Acetyl daidzin	Chr03:3035734:A:G	3	3035734	3.9e-10	MLM
Acetyl daidzin	Chr03:31758815:A:G	3	31758815	1.87e-11	MLM
Acetyl daidzin	Chr03:39751557:C:G	3	39751557	4.24e-27	MLM
Acetyl daidzin	Chr03:45034536:C:T	3	45034536	4.81e-09	MLM
Acetyl daidzin	Chr03:45597240:A:G	3	45597240	4.81e-09	MLM
Acetyl daidzin	Chr03:4670957:A:T	3	4670957	1.44e-09	MLM
Acetyl daidzin	Chr03:4713237:A:G	3	4713237	6.53e-09	MLM
Acetyl daidzin	Chr03:5873920:G:T	3	5873920	2.99e-10	MLM
Acetyl daidzin	Chr03:6365512:A:G	3	6365512	1.15e-11	MLM
Acetyl daidzin	Chr03:6879648:C:T	3	6879648	8.3e-36	MLM
Acetyl daidzin	Chr03:7563505:A:G	3	7563505	5.75e-10	MLM
Acetyl daidzin	Chr03:7864513:A:G	3	7864513	9.91e-10	MLM
Acetyl daidzin	Chr03:7941562:A:G	3	7941562	2.99e-10	MLM
Acetyl daidzin	Chr03:8197187:C:T	3	8197187	3.64e-12	MLM
Acetyl daidzin	Chr03:9478290:A:T	3	9478290	5.03e-11	MLM
Acetyl daidzin	Chr04:11509789:C:T	4	11509789	1.75e-11	MLM
Acetyl daidzin	Chr04:15209009:C:T	4	15209009	9.01e-14	MLM
Acetyl daidzin	Chr04:15944532:G:T	4	15944532	3.11e-61	MLM
Acetyl daidzin	Chr04:18268399:A:G	4	18268399	2.89e-08	MLM
Acetyl daidzin	Chr04:2445705:G:T	4	2445705	4.8e-08	MLM
Acetyl daidzin	Chr04:3236177:C:G	4	3236177	1.82e-10	MLM
Acetyl daidzin	Chr04:37087005:C:T	4	37087005	2.02e-12	MLM
Acetyl daidzin	Chr04:376298:C:T	4	376298	1.75e-14	MLM
Acetyl daidzin	Chr04:42139971:C:T	4	42139971	2.53e-35	MLM
Acetyl daidzin	Chr04:42312231:G:T	4	42312231	2.53e-35	MLM
Acetyl daidzin	Chr04:44415053:A:G	4	44415053	2.34e-13	MLM
Acetyl daidzin	Chr04:47874552:G:T	4	47874552	4.45e-10	MLM
Acetyl daidzin	Chr05:10881076:C:T	5	10881076	3.04e-20	MLM
Acetyl daidzin	Chr05:17990563:C:T	5	17990563	3.04e-20	MLM
Acetyl daidzin	Chr05:2112613:C:T	5	2112613	7.56e-22	MLM
Acetyl daidzin	Chr05:2319438:A:T	5	2319438	4.92e-08	MLM
Acetyl daidzin	Chr05:31253470:C:T	5	31253470	1.82e-11	MLM
Acetyl daidzin	Chr05:32336184:C:T	5	32336184	4.85e-09	MLM
Acetyl daidzin	Chr05:5207695:C:T	5	5207695	1.67e-19	MLM
Acetyl daidzin	Chr05:890007:G:T	5	890007	3.23e-08	MLM
Acetyl daidzin	Chr05:9192722:A:G	5	9192722	8.3e-91	MLM
Acetyl daidzin	Chr06:16606886:A:G	6	16606886	2.23e-12	MLM
Acetyl daidzin	Chr06:2789488:A:G	6	2789488	9.36e-09	MLM
Acetyl daidzin	Chr06:40490273:G:T	6	40490273	1.1e-12	MLM
Acetyl daidzin	Chr06:44890761:A:G	6	44890761	1.35e-09	MLM
Acetyl daidzin	Chr06:4658454:C:T	6	4658454	1.67e-08	MLM
Acetyl daidzin	Chr06:46731295:A:G	6	46731295	3.62e-38	MLM
Acetyl daidzin	Chr06:488196:A:G	6	488196	1.67e-19	MLM
Acetyl daidzin	Chr06:50369389:C:T	6	50369389	3.04e-20	MLM
Acetyl daidzin	Chr06:9618932:A:T	6	9618932	1.65e-09	MLM
Acetyl daidzin	Chr07:11165153:C:T	7	11165153	1.1e-12	MLM
Acetyl daidzin	Chr07:13079513:G:T	7	13079513	1.67e-19	MLM
Acetyl daidzin	Chr07:14293792:G:T	7	14293792	1.51e-09	MLM
Acetyl daidzin	Chr07:15219526:C:T	7	15219526	1.1e-12	MLM
Acetyl daidzin	Chr07:1660593:C:T	7	1660593	4.75e-34	MLM
Acetyl daidzin	Chr07:36841266:A:G	7	36841266	2.52e-321	MLM
Acetyl daidzin	Chr07:38187424:A:G	7	38187424	4.92e-08	MLM
Acetyl daidzin	Chr07:41120898:A:G	7	41120898	2.08e-26	MLM
Acetyl daidzin	Chr07:4689668:A:T	7	4689668	1.51e-11	MLM
Acetyl daidzin	Chr07:5212856:A:T	7	5212856	3.04e-20	MLM
Acetyl daidzin	Chr07:5283805:C:T	7	5283805	3.04e-20	MLM
Acetyl daidzin	Chr07:7627085:A:T	7	7627085	1.46e-18	MLM
Acetyl daidzin	Chr07:8916285:C:T	7	8916285	8.38e-18	MLM
Acetyl daidzin	Chr08:17074802:C:T	8	17074802	8.3e-91	MLM
Acetyl daidzin	Chr08:19156407:A:T	8	19156407	8.72e-09	MLM
Acetyl daidzin	Chr08:20808438:A:G	8	20808438	2.92e-22	MLM
Acetyl daidzin	Chr08:21424883:C:T	8	21424883	3.85e-26	MLM
Acetyl daidzin	Chr08:35891016:C:T	8	35891016	1.67e-19	MLM
Acetyl daidzin	Chr08:38125229:A:G	8	38125229	2.04e-12	MLM
Acetyl daidzin	Chr08:43078974:A:G	8	43078974	8e-48	MLM
Acetyl daidzin	Chr08:4348893:C:T	8	4348893	3.04e-20	MLM
Acetyl daidzin	Chr08:46731850:A:G	8	46731850	4.92e-08	MLM
Acetyl daidzin	Chr09:12681280:C:T	9	12681280	1.1e-12	MLM
Acetyl daidzin	Chr09:31230213:C:T	9	31230213	3.16e-09	MLM
Acetyl daidzin	Chr09:32029641:A:G	9	32029641	1.1e-12	MLM
Acetyl daidzin	Chr09:3688894:A:G	9	3688894	2.7e-13	MLM
Acetyl daidzin	Chr09:46528412:A:G	9	46528412	8.3e-91	MLM
Acetyl daidzin	Chr09:6085188:A:G	9	6085188	4.81e-09	MLM
Acetyl daidzin	Chr09:837687:C:T	9	837687	2.9e-10	MLM
Acetyl daidzin	Chr10:12903855:A:G	10	12903855	3.95e-16	MLM
Acetyl daidzin	Chr10:21984286:C:T	10	21984286	8.3e-91	MLM
Acetyl daidzin	Chr10:28713953:C:T	10	28713953	1.03e-10	MLM
Acetyl daidzin	Chr10:35063620:C:T	10	35063620	8.3e-91	MLM
Acetyl daidzin	Chr10:38297036:C:T	10	38297036	4.89e-10	MLM
Acetyl daidzin	Chr10:40337275:A:G	10	40337275	3.02e-10	MLM
Acetyl daidzin	Chr10:41038785:A:T	10	41038785	8.3e-91	MLM
Acetyl daidzin	Chr10:43170967:C:T	10	43170967	4.23e-10	MLM
Acetyl daidzin	Chr10:43594512:A:T	10	43594512	8.3e-36	MLM
Acetyl daidzin	Chr10:47644678:A:T	10	47644678	1.1e-12	MLM
Acetyl daidzin	Chr10:821816:C:T	10	821816	2.23e-08	MLM
Acetyl daidzin	Chr10:9107123:G:T	10	9107123	1.44e-08	MLM
Acetyl daidzin	Chr11:2653820:A:T	11	2653820	4.84e-08	MLM
Acetyl daidzin	Chr11:2746504:A:G	11	2746504	7.79e-12	MLM
Acetyl daidzin	Chr12:11196107:A:T	12	11196107	1.67e-35	MLM
Acetyl daidzin	Chr12:12145747:C:T	12	12145747	2.05e-08	MLM
Acetyl daidzin	Chr12:13290792:A:G	12	13290792	6.4e-09	MLM
Acetyl daidzin	Chr12:16299714:A:G	12	16299714	6.74e-11	MLM
Acetyl daidzin	Chr12:17581004:A:T	12	17581004	6.44e-15	MLM
Acetyl daidzin	Chr12:18984274:A:G	12	18984274	8.3e-91	MLM
Acetyl daidzin	Chr12:20200673:A:T	12	20200673	1.82e-12	MLM
Acetyl daidzin	Chr12:20889474:A:G	12	20889474	2.34e-13	MLM
Acetyl daidzin	Chr12:20921357:C:T	12	20921357	2.34e-13	MLM
Acetyl daidzin	Chr12:20927854:C:T	12	20927854	2.34e-13	MLM
Acetyl daidzin	Chr12:21695400:A:G	12	21695400	2.34e-13	MLM
Acetyl daidzin	Chr12:23847117:C:T	12	23847117	4.7e-24	MLM
Acetyl daidzin	Chr12:29018855:A:G	12	29018855	1.1e-12	MLM
Acetyl daidzin	Chr12:30668177:A:G	12	30668177	2.34e-13	MLM
Acetyl daidzin	Chr12:311672:C:T	12	311672	8.3e-91	MLM
Acetyl daidzin	Chr12:31698673:A:G	12	31698673	2.34e-13	MLM
Acetyl daidzin	Chr12:34948171:A:T	12	34948171	2.51e-18	MLM
Acetyl daidzin	Chr12:38880553:A:T	12	38880553	4.81e-09	MLM
Acetyl daidzin	Chr12:38989478:C:T	12	38989478	1.3e-08	MLM
Acetyl daidzin	Chr12:39063665:A:G	12	39063665	2.89e-12	MLM
Acetyl daidzin	Chr12:39254995:C:T	12	39254995	1.61e-10	MLM
Acetyl daidzin	Chr12:39389956:G:T	12	39389956	8.3e-36	MLM
Acetyl daidzin	Chr13:10401075:A:T	13	10401075	1.1e-12	MLM
Acetyl daidzin	Chr13:10735619:C:T	13	10735619	4.57e-08	MLM
Acetyl daidzin	Chr13:11367772:C:T	13	11367772	1.45e-11	MLM
Acetyl daidzin	Chr13:12575477:C:T	13	12575477	1.1e-12	MLM
Acetyl daidzin	Chr13:12616386:A:G	13	12616386	4.02e-12	MLM
Acetyl daidzin	Chr13:13181327:C:T	13	13181327	1.34e-09	MLM
Acetyl daidzin	Chr13:13774678:A:G	13	13774678	4.18e-11	MLM
Acetyl daidzin	Chr13:13781031:A:G	13	13781031	9.92e-10	MLM
Acetyl daidzin	Chr13:15702394:A:G	13	15702394	1.01e-10	MLM
Acetyl daidzin	Chr13:18690947:C:T	13	18690947	2.84e-12	MLM
Acetyl daidzin	Chr13:18821690:A:T	13	18821690	7.86e-10	MLM
Acetyl daidzin	Chr13:27649963:A:G	13	27649963	8.22e-12	MLM
Acetyl daidzin	Chr13:29696846:A:G	13	29696846	1.6e-08	MLM
Acetyl daidzin	Chr13:30556901:C:T	13	30556901	2.34e-13	MLM
Acetyl daidzin	Chr13:31806865:A:G	13	31806865	8.3e-91	MLM
Acetyl daidzin	Chr13:31913222:A:T	13	31913222	3.54e-10	MLM
Acetyl daidzin	Chr13:36109920:G:T	13	36109920	4.31e-26	MLM
Acetyl daidzin	Chr13:37570609:C:T	13	37570609	2.7e-13	MLM
Acetyl daidzin	Chr13:39280839:C:T	13	39280839	1.76e-08	MLM
Acetyl daidzin	Chr13:40610567:C:T	13	40610567	5.19e-33	MLM
Acetyl daidzin	Chr13:43531710:A:T	13	43531710	1.84e-08	MLM
Acetyl daidzin	Chr14:12126388:A:C	14	12126388	2.52e-09	MLM
Acetyl daidzin	Chr14:15913030:C:T	14	15913030	7.83e-13	MLM
Acetyl daidzin	Chr14:16354656:A:T	14	16354656	4.52e-08	MLM
Acetyl daidzin	Chr14:16872198:C:T	14	16872198	1.11e-09	MLM
Acetyl daidzin	Chr14:17056411:A:G	14	17056411	4.89e-10	MLM
Acetyl daidzin	Chr14:17167225:C:T	14	17167225	9.1e-24	MLM
Acetyl daidzin	Chr14:17257532:A:C	14	17257532	4.12e-12	MLM
Acetyl daidzin	Chr14:22510217:C:T	14	22510217	8.3e-91	MLM
Acetyl daidzin	Chr14:23218391:A:G	14	23218391	1.67e-19	MLM
Acetyl daidzin	Chr14:32841880:A:G	14	32841880	3.23e-08	MLM
Acetyl daidzin	Chr14:43139503:C:T	14	43139503	1.91e-12	MLM
Acetyl daidzin	Chr14:4347312:A:G	14	4347312	1.28e-12	MLM
Acetyl daidzin	Chr14:44384160:C:T	14	44384160	4.81e-09	MLM
Acetyl daidzin	Chr14:49036699:A:G	14	49036699	3.27e-23	MLM
Acetyl daidzin	Chr14:5712191:A:G	14	5712191	4.81e-09	MLM
Acetyl daidzin	Chr15:11658779:C:T	15	11658779	4.81e-09	MLM
Acetyl daidzin	Chr15:14953290:A:G	15	14953290	8.3e-91	MLM
Acetyl daidzin	Chr15:14980652:A:G	15	14980652	8.3e-91	MLM
Acetyl daidzin	Chr15:18506708:C:T	15	18506708	5.16e-09	MLM
Acetyl daidzin	Chr15:20833850:A:G	15	20833850	5e-09	MLM
Acetyl daidzin	Chr15:21899204:A:C	15	21899204	4.87e-08	MLM
Acetyl daidzin	Chr15:22011314:A:G	15	22011314	2.8e-23	MLM
Acetyl daidzin	Chr15:22339824:A:G	15	22339824	2.82e-09	MLM
Acetyl daidzin	Chr15:30381500:A:G	15	30381500	6.22e-37	MLM
Acetyl daidzin	Chr15:31498436:A:C	15	31498436	3.75e-10	MLM
Acetyl daidzin	Chr15:32087075:C:T	15	32087075	1.54e-12	MLM
Acetyl daidzin	Chr15:32564460:C:T	15	32564460	8.3e-91	MLM
Acetyl daidzin	Chr15:32573220:A:G	15	32573220	8.3e-91	MLM
Acetyl daidzin	Chr15:32658117:A:T	15	32658117	1.86e-25	MLM
Acetyl daidzin	Chr15:32682137:A:G	15	32682137	1.96e-08	MLM
Acetyl daidzin	Chr15:35286799:C:T	15	35286799	1.8e-13	MLM
Acetyl daidzin	Chr15:40090960:C:T	15	40090960	3.23e-08	MLM
Acetyl daidzin	Chr15:4689435:C:G	15	4689435	3.95e-16	MLM
Acetyl daidzin	Chr15:6346146:C:T	15	6346146	2.67e-10	MLM
Acetyl daidzin	Chr15:833666:G:T	15	833666	1.09e-08	MLM
Acetyl daidzin	Chr16:14645454:A:T	16	14645454	2.34e-13	MLM
Acetyl daidzin	Chr16:26233042:A:T	16	26233042	4.57e-26	MLM
Acetyl daidzin	Chr16:28041175:C:T	16	28041175	1.62e-09	MLM
Acetyl daidzin	Chr16:28259095:A:G	16	28259095	1.89e-08	MLM
Acetyl daidzin	Chr16:28503267:C:T	16	28503267	8.3e-36	MLM
Acetyl daidzin	Chr16:28548063:A:G	16	28548063	4.31e-17	MLM
Acetyl daidzin	Chr16:28628550:C:T	16	28628550	8.3e-36	MLM
Acetyl daidzin	Chr16:28674818:A:G	16	28674818	1.95e-08	MLM
Acetyl daidzin	Chr16:28842517:G:T	16	28842517	8.3e-36	MLM
Acetyl daidzin	Chr16:28995329:C:T	16	28995329	3.32e-21	MLM
Acetyl daidzin	Chr16:29067678:G:T	16	29067678	6.58e-28	MLM
Acetyl daidzin	Chr16:29178853:C:T	16	29178853	8.3e-36	MLM
Acetyl daidzin	Chr16:29190234:A:C	16	29190234	5.33e-12	MLM
Acetyl daidzin	Chr16:30397700:A:T	16	30397700	6.52e-10	MLM
Acetyl daidzin	Chr16:30950699:A:G	16	30950699	4.31e-09	MLM
Acetyl daidzin	Chr16:32189886:A:G	16	32189886	2.34e-41	MLM
Acetyl daidzin	Chr16:33914105:G:T	16	33914105	3.21e-15	MLM
Acetyl daidzin	Chr16:36130328:A:G	16	36130328	4.67e-08	MLM
Acetyl daidzin	Chr16:36326020:C:T	16	36326020	3.23e-08	MLM
Acetyl daidzin	Chr16:36824984:C:T	16	36824984	1.87e-09	MLM
Acetyl daidzin	Chr17:15802833:C:T	17	15802833	1.92e-15	MLM
Acetyl daidzin	Chr17:18801917:A:G	17	18801917	3.61e-12	MLM
Acetyl daidzin	Chr17:22780444:C:T	17	22780444	4.23e-08	MLM
Acetyl daidzin	Chr17:34028027:A:G	17	34028027	2.26e-45	MLM
Acetyl daidzin	Chr17:35154361:C:T	17	35154361	2.67e-08	MLM
Acetyl daidzin	Chr17:4334515:C:T	17	4334515	1.94e-08	MLM
Acetyl daidzin	Chr17:9900521:C:T	17	9900521	2.79e-13	MLM
Acetyl daidzin	Chr18:10368721:C:T	18	10368721	5.12e-09	MLM
Acetyl daidzin	Chr18:14925863:C:T	18	14925863	1.4e-13	MLM
Acetyl daidzin	Chr18:16394505:C:T	18	16394505	1.67e-19	MLM
Acetyl daidzin	Chr18:18150288:A:G	18	18150288	4.31e-10	MLM
Acetyl daidzin	Chr18:18864171:C:T	18	18864171	8.3e-10	MLM
Acetyl daidzin	Chr18:19720134:C:T	18	19720134	2.17e-10	MLM
Acetyl daidzin	Chr18:21052540:A:T	18	21052540	2.97e-08	MLM
Acetyl daidzin	Chr18:2138965:A:C	18	2138965	9.56e-14	MLM
Acetyl daidzin	Chr18:222834:A:C	18	222834	1.23e-08	MLM
Acetyl daidzin	Chr18:24064:C:T	18	24064	4.4e-10	MLM
Acetyl daidzin	Chr18:36553877:C:T	18	36553877	1.88e-10	MLM
Acetyl daidzin	Chr18:36613555:A:G	18	36613555	1.61e-13	MLM
Acetyl daidzin	Chr18:3828776:A:G	18	3828776	2.96e-08	MLM
Acetyl daidzin	Chr18:42501847:A:G	18	42501847	3.72e-08	MLM
Acetyl daidzin	Chr18:43172385:C:T	18	43172385	1.1e-21	MLM
Acetyl daidzin	Chr18:45561309:G:T	18	45561309	2.87e-18	MLM
Acetyl daidzin	Chr18:45713974:A:G	18	45713974	2.66e-22	MLM
Acetyl daidzin	Chr18:46392385:C:T	18	46392385	2.66e-22	MLM
Acetyl daidzin	Chr18:46686483:A:G	18	46686483	2.66e-22	MLM
Acetyl daidzin	Chr18:51353934:A:G	18	51353934	9.44e-13	MLM
Acetyl daidzin	Chr18:51476611:C:T	18	51476611	2.53e-35	MLM
Acetyl daidzin	Chr18:56375883:C:T	18	56375883	8.03e-16	MLM
Acetyl daidzin	Chr18:920507:G:T	18	920507	1.84e-08	MLM
Acetyl daidzin	Chr19:13271092:C:T	19	13271092	3.23e-08	MLM
Acetyl daidzin	Chr19:16370157:C:T	19	16370157	3.23e-08	MLM
Acetyl daidzin	Chr19:17734191:C:T	19	17734191	1.67e-14	MLM
Acetyl daidzin	Chr19:24515865:A:T	19	24515865	4.14e-25	MLM
Acetyl daidzin	Chr19:24668964:C:T	19	24668964	3.23e-08	MLM
Acetyl daidzin	Chr19:25508085:C:G	19	25508085	5.11e-09	MLM
Acetyl daidzin	Chr19:33760607:A:G	19	33760607	2.92e-20	MLM
Acetyl daidzin	Chr19:40149895:G:T	19	40149895	2.34e-13	MLM
Acetyl daidzin	Chr19:4115381:C:T	19	4115381	6.3e-132	MLM
Acetyl daidzin	Chr19:41714421:A:G	19	41714421	2.66e-22	MLM
Acetyl daidzin	Chr19:41888174:A:T	19	41888174	2.32e-14	MLM
Acetyl daidzin	Chr19:42112493:A:T	19	42112493	8.53e-09	MLM
Acetyl daidzin	Chr19:46292309:A:G	19	46292309	2.09e-08	MLM
Acetyl daidzin	Chr19:48288041:G:T	19	48288041	2.53e-35	MLM
Acetyl daidzin	Chr19:48594126:A:T	19	48594126	3.97e-08	MLM
Acetyl daidzin	Chr19:7961740:A:C	19	7961740	1.07e-16	MLM
Acetyl daidzin	Chr20:11584101:C:T	20	11584101	1.1e-12	MLM
Acetyl daidzin	Chr20:12519746:A:G	20	12519746	2.66e-22	MLM
Acetyl daidzin	Chr20:23869165:C:T	20	23869165	2.51e-08	MLM
Acetyl daidzin	Chr20:32991851:A:G	20	32991851	9.49e-15	MLM
Acetyl daidzin	Chr20:33003776:A:T	20	33003776	2.05e-10	MLM
Acetyl daidzin	Chr20:33127073:A:G	20	33127073	1.52e-08	MLM
Acetyl daidzin	Chr20:33163813:C:T	20	33163813	8.06e-61	MLM
Acetyl daidzin	Chr20:33193145:A:C	20	33193145	6.47e-09	MLM
Acetyl daidzin	Chr20:33273008:C:T	20	33273008	3.7e-08	MLM
Acetyl daidzin	Chr20:33301562:C:T	20	33301562	1.23e-12	MLM
Acetyl daidzin	Chr20:33319910:C:T	20	33319910	7.24e-09	MLM
Acetyl daidzin	Chr20:33367630:A:G	20	33367630	1.68e-13	MLM
Acetyl daidzin	Chr20:33400043:C:G	20	33400043	2.2e-09	MLM
Acetyl daidzin	Chr20:33443734:A:T	20	33443734	1.47e-09	MLM
Acetyl daidzin	Chr20:33577063:A:G	20	33577063	1.4e-08	MLM
Acetyl daidzin	Chr20:33606715:C:T	20	33606715	1.36e-13	MLM
Acetyl daidzin	Chr20:33624186:A:G	20	33624186	1.12e-08	MLM
Acetyl daidzin	Chr20:34247296:C:T	20	34247296	1.12e-08	MLM
Acetyl daidzin	Chr20:34359023:A:G	20	34359023	3.44e-11	MLM
Acetyl daidzin	Chr20:34361668:A:G	20	34361668	6.91e-09	MLM
Acetyl daidzin	Chr20:34391446:C:T	20	34391446	7.88e-09	MLM
Acetyl daidzin	Chr20:39109768:A:C	20	39109768	2.34e-13	MLM
Acetyl daidzin	Chr20:41763844:C:T	20	41763844	6.82e-12	MLM
Acetyl daidzin	Chr20:44715622:C:T	20	44715622	1.11e-21	MLM
Acetyl daidzin	Chr20:47261188:C:T	20	47261188	1.69e-09	MLM
Acetyl daidzin	Chr20:6743552:A:G	20	6743552	1.24e-45	MLM
Acetyl daidzin	Chr20:7066971:A:G	20	7066971	1.33e-11	MLM
Acetyl daidzin	Chr04:47874552:G:T	4	47874552	9e-11	MLMM
Acetyl daidzin	Chr13:10735619:C:T	13	10735619	7.63e-09	MLMM
Daidzin	Chr01:35977894:A:C	1	35977894	1.89e-15	Blink
Daidzin	Chr02:18868209:C:T	2	18868209	6.09e-18	Blink
Daidzin	Chr02:287254:A:T	2	287254	6.09e-18	Blink
Daidzin	Chr02:42771533:C:T	2	42771533	6.09e-18	Blink
Daidzin	Chr03:23556211:A:G	3	23556211	7.95e-10	Blink
Daidzin	Chr03:4560965:A:G	3	4560965	6.09e-18	Blink
Daidzin	Chr03:6910808:C:G	3	6910808	6.09e-18	Blink
Daidzin	Chr03:8296186:C:T	3	8296186	6.09e-18	Blink
Daidzin	Chr05:6390474:C:T	5	6390474	2e-14	Blink
Daidzin	Chr08:11187086:G:T	8	11187086	1.48e-09	Blink
Daidzin	Chr09:5073076:C:T	9	5073076	6.09e-18	Blink
Daidzin	Chr10:3873683:C:T	10	3873683	1.17e-10	Blink
Daidzin	Chr10:40337275:A:G	10	40337275	3.11e-11	Blink
Daidzin	Chr10:43796094:C:T	10	43796094	6.09e-18	Blink
Daidzin	Chr10:44077671:A:G	10	44077671	6.09e-18	Blink
Daidzin	Chr11:12747530:A:G	11	12747530	6.75e-16	Blink
Daidzin	Chr13:18722639:C:T	13	18722639	4.87e-13	Blink
Daidzin	Chr14:13713886:A:G	14	13713886	6.09e-16	Blink
Daidzin	Chr14:30643399:A:G	14	30643399	6.09e-18	Blink
Daidzin	Chr15:30381500:A:G	15	30381500	1.06e-08	Blink
Daidzin	Chr15:44517734:C:G	15	44517734	6.09e-18	Blink
Daidzin	Chr16:27510546:C:T	16	27510546	6.09e-18	Blink
Daidzin	Chr18:50696088:A:G	18	50696088	7.57e-11	Blink
Daidzin	Chr20:33012494:C:T	20	33012494	2.54e-08	Blink
Daidzin	Chr20:33089756:G:T	20	33089756	6.09e-18	Blink
Daidzin	Chr20:33098957:G:T	20	33098957	6.09e-18	Blink
Daidzin	Chr20:33526437:A:G	20	33526437	6.09e-18	Blink
Daidzin	Chr20:33536598:G:T	20	33536598	2.01e-30	Blink
Daidzin	Chr20:33583303:G:T	20	33583303	2.01e-32	Blink
Daidzin	Chr20:33606715:C:T	20	33606715	2.08e-15	Blink
Daidzin	Chr02:12960968:A:G	2	12960968	3.02e-09	FarmCPU
Daidzin	Chr02:648719:A:G	2	648719	7.57e-12	FarmCPU
Daidzin	Chr18:4059639:G:T	18	4059639	1.86e-08	FarmCPU
Daidzin	Chr18:50696088:A:G	18	50696088	4.22e-09	FarmCPU
Daidzin	Chr18:50738815:A:C	18	50738815	5.23e-13	FarmCPU
Daidzin	Chr05:6390474:C:T	5	6390474	4.88e-12	MLMM
Daidzin	Chr11:34665548:A:G	11	34665548	7.73e-12	MLMM
Daidzin	Chr14:13713886:A:G	14	13713886	5.43e-09	MLMM
Daidzin	Chr14:30643399:A:G	14	30643399	1.28e-09	MLMM
Daidzin	Chr15:44517734:C:G	15	44517734	1.38e-19	MLMM
Daidzin	Chr19:48594126:A:T	19	48594126	5.61e-09	MLMM
Genistin	Chr03:31758815:A:G	3	31758815	1.65e-08	FarmCPU
Genistin	Chr04:39769112:A:G	4	39769112	2.71e-08	FarmCPU
Genistin	Chr07:17407305:A:G	7	17407305	2.02e-08	FarmCPU
Genistin	Chr07:7782208:C:T	7	7782208	2.32e-11	FarmCPU
Genistin	Chr16:31930954:A:G	16	31930954	4.37e-10	FarmCPU
Genistin	Chr16:33858611:A:G	16	33858611	6.38e-14	FarmCPU
Genistin	Chr19:1673173:C:T	19	1673173	6.12e-13	FarmCPU
Genistin	Chr20:34505747:A:T	20	34505747	5.42e-10	FarmCPU
Genistin	Chr20:34521942:C:G	20	34521942	9.04e-11	FarmCPU
Genistin	Chr01:10576055:C:T	1	10576055	3.85e-221	MLM
Genistin	Chr01:33266331:C:G	1	33266331	4.37e-08	MLM
Genistin	Chr01:3379402:A:G	1	3379402	6.46e-14	MLM
Genistin	Chr01:36192245:A:G	1	36192245	3.39e-33	MLM
Genistin	Chr01:42285926:A:G	1	42285926	6.37e-10	MLM
Genistin	Chr01:42615323:A:C	1	42615323	4.23e-23	MLM
Genistin	Chr01:46110466:A:G	1	46110466	8.46e-11	MLM
Genistin	Chr01:892590:A:T	1	892590	4.1e-31	MLM
Genistin	Chr02:12841788:C:T	2	12841788	3.8e-08	MLM
Genistin	Chr02:12960968:A:G	2	12960968	2.72e-09	MLM
Genistin	Chr02:1459897:C:T	2	1459897	1.21e-24	MLM
Genistin	Chr02:15862596:C:T	2	15862596	2.53e-08	MLM
Genistin	Chr02:20877352:C:T	2	20877352	2.34e-26	MLM
Genistin	Chr02:23064057:C:T	2	23064057	7.88e-10	MLM
Genistin	Chr02:287254:A:T	2	287254	1.64e-11	MLM
Genistin	Chr02:316227:A:C	2	316227	3.2e-20	MLM
Genistin	Chr02:42762828:A:T	2	42762828	1.23e-15	MLM
Genistin	Chr02:46713868:G:T	2	46713868	2.19e-15	MLM
Genistin	Chr02:47387920:C:T	2	47387920	2.46e-08	MLM
Genistin	Chr02:6002413:A:G	2	6002413	2.39e-09	MLM
Genistin	Chr02:618187:A:T	2	618187	4.18e-14	MLM
Genistin	Chr02:648719:A:G	2	648719	2.48e-11	MLM
Genistin	Chr02:6775693:A:T	2	6775693	3.68e-16	MLM
Genistin	Chr02:9339174:A:C	2	9339174	9.79e-14	MLM
Genistin	Chr03:13957003:C:T	3	13957003	9.73e-09	MLM
Genistin	Chr03:192333:A:G	3	192333	5.57e-29	MLM
Genistin	Chr03:19264101:A:G	3	19264101	3.69e-12	MLM
Genistin	Chr03:26299970:A:G	3	26299970	9.28e-158	MLM
Genistin	Chr03:28583445:C:T	3	28583445	1.36e-08	MLM
Genistin	Chr03:31758815:A:G	3	31758815	2.71e-15	MLM
Genistin	Chr03:32267163:C:T	3	32267163	2.3e-10	MLM
Genistin	Chr03:33059462:G:T	3	33059462	4.58e-11	MLM
Genistin	Chr03:33364384:G:T	3	33364384	2.5e-09	MLM
Genistin	Chr03:40296866:A:G	3	40296866	2.38e-21	MLM
Genistin	Chr03:40992701:C:G	3	40992701	2.25e-16	MLM
Genistin	Chr03:410620:C:T	3	410620	8.73e-09	MLM
Genistin	Chr03:45045236:C:T	3	45045236	4.82e-35	MLM
Genistin	Chr03:45590605:A:G	3	45590605	1.41e-09	MLM
Genistin	Chr03:5139676:C:G	3	5139676	2.36e-27	MLM
Genistin	Chr03:5231077:C:T	3	5231077	3.73e-08	MLM
Genistin	Chr03:5303498:C:T	3	5303498	1.4e-10	MLM
Genistin	Chr03:6765328:C:T	3	6765328	6e-09	MLM
Genistin	Chr03:6826604:A:G	3	6826604	2.14e-09	MLM
Genistin	Chr03:6879648:C:T	3	6879648	3.2e-20	MLM
Genistin	Chr03:7470893:C:T	3	7470893	2.68e-10	MLM
Genistin	Chr04:10070801:A:T	4	10070801	1.96e-09	MLM
Genistin	Chr04:13246793:A:G	4	13246793	2.83e-14	MLM
Genistin	Chr04:15645006:A:G	4	15645006	3.44e-11	MLM
Genistin	Chr04:15723395:C:G	4	15723395	3.44e-11	MLM
Genistin	Chr04:15944532:G:T	4	15944532	6.71e-14	MLM
Genistin	Chr04:16224770:C:T	4	16224770	2.24e-09	MLM
Genistin	Chr04:23686060:C:T	4	23686060	2.98e-08	MLM
Genistin	Chr04:269243:C:T	4	269243	3.46e-08	MLM
Genistin	Chr04:3118678:A:G	4	3118678	1.22e-57	MLM
Genistin	Chr04:39979807:A:G	4	39979807	2.89e-08	MLM
Genistin	Chr04:41450711:A:G	4	41450711	7.43e-59	MLM
Genistin	Chr04:44310929:C:T	4	44310929	7.71e-09	MLM
Genistin	Chr04:4470418:A:G	4	4470418	2.86e-31	MLM
Genistin	Chr04:45402928:C:T	4	45402928	3.36e-36	MLM
Genistin	Chr04:45760374:A:G	4	45760374	1.89e-09	MLM
Genistin	Chr04:46387853:A:C	4	46387853	4.39e-24	MLM
Genistin	Chr04:47874552:G:T	4	47874552	7.75e-14	MLM
Genistin	Chr04:49634805:A:C	4	49634805	3.13e-08	MLM
Genistin	Chr04:49645436:A:T	4	49645436	1.71e-15	MLM
Genistin	Chr04:8195106:A:T	4	8195106	5.84e-12	MLM
Genistin	Chr05:10000465:A:G	5	10000465	3.08e-10	MLM
Genistin	Chr05:17925571:A:G	5	17925571	4.19e-13	MLM
Genistin	Chr05:30183390:A:G	5	30183390	2.95e-12	MLM
Genistin	Chr05:31154105:C:T	5	31154105	2.84e-25	MLM
Genistin	Chr05:31253470:C:T	5	31253470	1.17e-10	MLM
Genistin	Chr05:32540314:A:G	5	32540314	2.8e-10	MLM
Genistin	Chr05:40137355:A:G	5	40137355	3.51e-08	MLM
Genistin	Chr06:15349920:C:T	6	15349920	2.66e-11	MLM
Genistin	Chr06:18045544:C:T	6	18045544	8.71e-37	MLM
Genistin	Chr06:1824329:A:G	6	1824329	2.59e-09	MLM
Genistin	Chr06:19650763:C:T	6	19650763	2.06e-11	MLM
Genistin	Chr06:32825806:A:G	6	32825806	6.59e-112	MLM
Genistin	Chr06:40284705:A:C	6	40284705	2.4e-24	MLM
Genistin	Chr06:44325872:A:T	6	44325872	2.87e-10	MLM
Genistin	Chr06:6677338:A:G	6	6677338	2.93e-08	MLM
Genistin	Chr06:67292:A:T	6	67292	9.57e-09	MLM
Genistin	Chr06:9887461:A:G	6	9887461	4.77e-11	MLM
Genistin	Chr07:11694713:A:T	7	11694713	5.02e-23	MLM
Genistin	Chr07:12527963:A:G	7	12527963	3.28e-08	MLM
Genistin	Chr07:13069869:C:T	7	13069869	5.02e-23	MLM
Genistin	Chr07:13090736:A:G	7	13090736	5.02e-23	MLM
Genistin	Chr07:13333776:A:G	7	13333776	5.02e-23	MLM
Genistin	Chr07:13670306:C:T	7	13670306	2.01e-08	MLM
Genistin	Chr07:13996330:A:G	7	13996330	1.32e-08	MLM
Genistin	Chr07:14187919:A:G	7	14187919	1.7e-11	MLM
Genistin	Chr07:15690617:A:G	7	15690617	1.66e-16	MLM
Genistin	Chr07:18353888:C:T	7	18353888	3.31e-43	MLM
Genistin	Chr07:21227643:A:G	7	21227643	2.82e-10	MLM
Genistin	Chr07:21781108:A:G	7	21781108	4.41e-11	MLM
Genistin	Chr07:23828740:A:G	7	23828740	3.89e-18	MLM
Genistin	Chr07:25635474:A:G	7	25635474	3.9e-38	MLM
Genistin	Chr07:2751930:C:T	7	2751930	2.67e-09	MLM
Genistin	Chr07:2962371:A:T	7	2962371	3.17e-13	MLM
Genistin	Chr07:3042228:A:G	7	3042228	1.55e-12	MLM
Genistin	Chr07:3087346:A:G	7	3087346	1.01e-08	MLM
Genistin	Chr07:31122404:A:C	7	31122404	2.02e-11	MLM
Genistin	Chr07:31912642:A:C	7	31912642	3.17e-09	MLM
Genistin	Chr07:32995179:C:T	7	32995179	7.72e-12	MLM
Genistin	Chr07:35516197:A:T	7	35516197	1.53e-12	MLM
Genistin	Chr07:36677903:A:G	7	36677903	1.08e-08	MLM
Genistin	Chr07:44092307:C:T	7	44092307	5.11e-11	MLM
Genistin	Chr07:5196962:A:T	7	5196962	9.57e-09	MLM
Genistin	Chr07:5995143:A:T	7	5995143	9.57e-09	MLM
Genistin	Chr07:6701412:A:T	7	6701412	9.57e-09	MLM
Genistin	Chr07:8636668:A:T	7	8636668	6.93e-26	MLM
Genistin	Chr07:9431341:A:G	7	9431341	5.32e-09	MLM
Genistin	Chr07:9553148:A:G	7	9553148	3.95e-08	MLM
Genistin	Chr07:9602070:A:G	7	9602070	1.28e-10	MLM
Genistin	Chr07:9712047:A:G	7	9712047	1.34e-21	MLM
Genistin	Chr08:11187086:G:T	8	11187086	1.14e-10	MLM
Genistin	Chr08:11770132:A:G	8	11770132	1.3e-08	MLM
Genistin	Chr08:13987091:A:G	8	13987091	1.07e-14	MLM
Genistin	Chr08:18907534:A:G	8	18907534	8.7e-09	MLM
Genistin	Chr08:22285162:A:G	8	22285162	2.42e-09	MLM
Genistin	Chr08:22364787:C:T	8	22364787	8.36e-11	MLM
Genistin	Chr08:25537909:C:T	8	25537909	1.39e-09	MLM
Genistin	Chr08:29691876:A:G	8	29691876	2.09e-10	MLM
Genistin	Chr08:37410522:A:G	8	37410522	2.01e-22	MLM
Genistin	Chr08:41401336:C:G	8	41401336	2.58e-09	MLM
Genistin	Chr08:41666399:C:T	8	41666399	1.57e-08	MLM
Genistin	Chr08:8120405:A:T	8	8120405	8.46e-19	MLM
Genistin	Chr08:8727343:C:T	8	8727343	3.11e-19	MLM
Genistin	Chr09:15497933:A:G	9	15497933	2.02e-09	MLM
Genistin	Chr09:20673453:A:G	9	20673453	2.84e-25	MLM
Genistin	Chr09:22004216:A:G	9	22004216	3.69e-12	MLM
Genistin	Chr09:22287839:C:T	9	22287839	3.23e-09	MLM
Genistin	Chr09:30370142:C:T	9	30370142	2.17e-16	MLM
Genistin	Chr09:32368062:A:G	9	32368062	2.38e-17	MLM
Genistin	Chr09:34344896:A:G	9	34344896	4.73e-13	MLM
Genistin	Chr09:34365648:A:C	9	34365648	7.72e-121	MLM
Genistin	Chr09:34837682:A:G	9	34837682	8.8e-10	MLM
Genistin	Chr09:36986053:A:G	9	36986053	2.62e-14	MLM
Genistin	Chr09:37701091:C:T	9	37701091	2.12e-08	MLM
Genistin	Chr09:6318886:A:G	9	6318886	5.42e-09	MLM
Genistin	Chr10:11512815:A:G	10	11512815	7.81e-10	MLM
Genistin	Chr10:13817337:A:C	10	13817337	7.94e-27	MLM
Genistin	Chr10:16429097:A:G	10	16429097	1.05e-10	MLM
Genistin	Chr10:26526337:A:G	10	26526337	1.44e-15	MLM
Genistin	Chr10:29296546:A:G	10	29296546	6.96e-21	MLM
Genistin	Chr10:33338114:A:G	10	33338114	2.36e-10	MLM
Genistin	Chr10:35590234:C:T	10	35590234	6.71e-20	MLM
Genistin	Chr10:3653195:A:G	10	3653195	4.15e-08	MLM
Genistin	Chr10:40331670:A:G	10	40331670	1.52e-13	MLM
Genistin	Chr10:40337275:A:G	10	40337275	1.13e-10	MLM
Genistin	Chr10:43583391:A:G	10	43583391	2.09e-13	MLM
Genistin	Chr10:43594512:A:T	10	43594512	3.2e-20	MLM
Genistin	Chr10:46224155:A:C	10	46224155	2.32e-09	MLM
Genistin	Chr10:6398291:A:T	10	6398291	7.38e-09	MLM
Genistin	Chr11:11887034:A:G	11	11887034	6.49e-86	MLM
Genistin	Chr11:12505425:A:T	11	12505425	2.23e-18	MLM
Genistin	Chr11:15341548:C:T	11	15341548	6.49e-86	MLM
Genistin	Chr11:22246852:C:T	11	22246852	1.49e-10	MLM
Genistin	Chr11:25992991:A:G	11	25992991	8.45e-20	MLM
Genistin	Chr11:26966154:C:T	11	26966154	5.02e-23	MLM
Genistin	Chr11:31458050:C:T	11	31458050	4.73e-08	MLM
Genistin	Chr11:33583757:A:G	11	33583757	0	MLM
Genistin	Chr11:33978349:C:T	11	33978349	5.02e-23	MLM
Genistin	Chr12:1142851:A:C	12	1142851	9.3e-10	MLM
Genistin	Chr12:15947887:A:G	12	15947887	1.72e-25	MLM
Genistin	Chr12:16016457:C:T	12	16016457	1.23e-08	MLM
Genistin	Chr12:16421613:A:G	12	16421613	4.82e-10	MLM
Genistin	Chr12:16460721:A:G	12	16460721	2.16e-08	MLM
Genistin	Chr12:16640982:C:T	12	16640982	2.24e-13	MLM
Genistin	Chr12:17074881:A:G	12	17074881	1.04e-08	MLM
Genistin	Chr12:18370040:C:T	12	18370040	6.34e-09	MLM
Genistin	Chr12:18914871:C:T	12	18914871	4.05e-12	MLM
Genistin	Chr12:18980862:C:T	12	18980862	4.85e-15	MLM
Genistin	Chr12:24508499:C:T	12	24508499	1.44e-10	MLM
Genistin	Chr12:25852898:A:G	12	25852898	2.45e-21	MLM
Genistin	Chr12:29326072:C:T	12	29326072	1.85e-08	MLM
Genistin	Chr12:30730548:A:T	12	30730548	1.41e-38	MLM
Genistin	Chr12:32141143:A:G	12	32141143	5.6e-27	MLM
Genistin	Chr12:34213615:A:G	12	34213615	1.03e-08	MLM
Genistin	Chr12:36746655:A:T	12	36746655	5.9e-10	MLM
Genistin	Chr12:39326989:A:G	12	39326989	1.17e-10	MLM
Genistin	Chr12:39389956:G:T	12	39389956	3.2e-20	MLM
Genistin	Chr12:4660854:A:G	12	4660854	6.84e-34	MLM
Genistin	Chr12:990650:C:T	12	990650	7.3e-09	MLM
Genistin	Chr13:10117683:G:T	13	10117683	9.27e-13	MLM
Genistin	Chr13:10826513:A:T	13	10826513	7.72e-12	MLM
Genistin	Chr13:13864182:C:T	13	13864182	9.27e-13	MLM
Genistin	Chr13:1598518:G:T	13	1598518	9.27e-13	MLM
Genistin	Chr13:18715711:A:G	13	18715711	6.32e-21	MLM
Genistin	Chr13:18722639:C:T	13	18722639	1.35e-14	MLM
Genistin	Chr13:18812952:C:T	13	18812952	2.41e-39	MLM
Genistin	Chr13:26516063:A:G	13	26516063	2.65e-09	MLM
Genistin	Chr13:27890991:C:T	13	27890991	5.05e-15	MLM
Genistin	Chr13:27918809:C:T	13	27918809	2.97e-09	MLM
Genistin	Chr13:29649232:C:T	13	29649232	4.81e-47	MLM
Genistin	Chr13:29739767:C:T	13	29739767	5.19e-17	MLM
Genistin	Chr13:31901516:A:G	13	31901516	1.04e-17	MLM
Genistin	Chr13:32054936:C:T	13	32054936	4.16e-08	MLM
Genistin	Chr13:32896935:C:T	13	32896935	1.66e-09	MLM
Genistin	Chr13:32979704:A:T	13	32979704	1.42e-21	MLM
Genistin	Chr13:33761865:C:T	13	33761865	2.84e-25	MLM
Genistin	Chr13:35551920:C:T	13	35551920	6.33e-12	MLM
Genistin	Chr13:37362494:A:G	13	37362494	4.56e-15	MLM
Genistin	Chr13:41013513:A:G	13	41013513	9.78e-09	MLM
Genistin	Chr13:42696132:A:G	13	42696132	2.39e-09	MLM
Genistin	Chr13:43531710:A:T	13	43531710	9.55e-15	MLM
Genistin	Chr13:44788980:A:T	13	44788980	4.62e-24	MLM
Genistin	Chr13:5698970:A:G	13	5698970	9.27e-13	MLM
Genistin	Chr13:7358009:G:T	13	7358009	9.27e-13	MLM
Genistin	Chr14:13212013:C:G	14	13212013	1.25e-11	MLM
Genistin	Chr14:13590250:C:T	14	13590250	1.78e-09	MLM
Genistin	Chr14:13660358:C:T	14	13660358	2.34e-08	MLM
Genistin	Chr14:17137316:G:T	14	17137316	1.78e-08	MLM
Genistin	Chr14:20229683:G:T	14	20229683	1.33e-61	MLM
Genistin	Chr14:20992389:C:T	14	20992389	4.56e-18	MLM
Genistin	Chr14:34222496:C:T	14	34222496	1.99e-08	MLM
Genistin	Chr14:39182567:G:T	14	39182567	1.69e-08	MLM
Genistin	Chr14:40854305:C:T	14	40854305	8.11e-12	MLM
Genistin	Chr14:41004657:A:T	14	41004657	7.17e-09	MLM
Genistin	Chr14:41206684:A:G	14	41206684	1.64e-15	MLM
Genistin	Chr14:42430550:C:T	14	42430550	1.14e-14	MLM
Genistin	Chr14:43723174:A:T	14	43723174	7.38e-24	MLM
Genistin	Chr14:44057500:C:T	14	44057500	2.89e-09	MLM
Genistin	Chr14:44382715:C:T	14	44382715	9.29e-13	MLM
Genistin	Chr14:44541652:C:T	14	44541652	1.76e-08	MLM
Genistin	Chr14:4746627:C:T	14	4746627	2.07e-08	MLM
Genistin	Chr14:48885932:A:G	14	48885932	2.08e-10	MLM
Genistin	Chr15:13767241:A:G	15	13767241	1.04e-49	MLM
Genistin	Chr15:15189433:C:T	15	15189433	2.86e-20	MLM
Genistin	Chr15:15943696:A:C	15	15943696	8.05e-14	MLM
Genistin	Chr15:17623664:C:T	15	17623664	9.53e-10	MLM
Genistin	Chr15:18622841:A:G	15	18622841	1.97e-08	MLM
Genistin	Chr15:22326812:C:T	15	22326812	1.12e-14	MLM
Genistin	Chr15:22356792:C:T	15	22356792	1.26e-09	MLM
Genistin	Chr15:22445443:C:T	15	22445443	3.73e-09	MLM
Genistin	Chr15:24216323:A:G	15	24216323	1e-09	MLM
Genistin	Chr15:24217797:C:T	15	24217797	4.68e-08	MLM
Genistin	Chr15:24254875:A:G	15	24254875	5.16e-09	MLM
Genistin	Chr15:24474327:C:T	15	24474327	2.24e-08	MLM
Genistin	Chr15:24933486:A:G	15	24933486	3.51e-08	MLM
Genistin	Chr15:26526808:C:T	15	26526808	2.37e-08	MLM
Genistin	Chr15:26533112:C:T	15	26533112	4.76e-09	MLM
Genistin	Chr15:27843779:A:G	15	27843779	2.3e-09	MLM
Genistin	Chr15:28378182:A:G	15	28378182	2.58e-09	MLM
Genistin	Chr15:28971752:A:G	15	28971752	3.69e-12	MLM
Genistin	Chr15:33387512:A:G	15	33387512	5.75e-20	MLM
Genistin	Chr15:35255011:C:T	15	35255011	1.54e-11	MLM
Genistin	Chr15:35323941:C:T	15	35323941	4.77e-11	MLM
Genistin	Chr15:43685331:A:T	15	43685331	1.27e-32	MLM
Genistin	Chr15:46341706:A:G	15	46341706	7.44e-18	MLM
Genistin	Chr15:47594353:A:G	15	47594353	2.7e-08	MLM
Genistin	Chr15:48946117:C:T	15	48946117	2.35e-09	MLM
Genistin	Chr16:11473674:C:T	16	11473674	1.41e-50	MLM
Genistin	Chr16:13282941:C:T	16	13282941	6.18e-88	MLM
Genistin	Chr16:13862239:A:G	16	13862239	2.09e-09	MLM
Genistin	Chr16:21042975:C:T	16	21042975	7.25e-11	MLM
Genistin	Chr16:25801441:A:G	16	25801441	2.78e-32	MLM
Genistin	Chr16:27334950:A:G	16	27334950	3.47e-14	MLM
Genistin	Chr16:27404638:A:G	16	27404638	7.32e-55	MLM
Genistin	Chr16:27422780:A:G	16	27422780	1.39e-09	MLM
Genistin	Chr16:27510546:C:T	16	27510546	2.09e-12	MLM
Genistin	Chr16:28503267:C:T	16	28503267	3.2e-20	MLM
Genistin	Chr16:28628550:C:T	16	28628550	3.2e-20	MLM
Genistin	Chr16:28842517:G:T	16	28842517	3.2e-20	MLM
Genistin	Chr16:29051583:C:T	16	29051583	7.66e-12	MLM
Genistin	Chr16:29058822:C:T	16	29058822	3.89e-21	MLM
Genistin	Chr16:29066052:G:T	16	29066052	2.84e-10	MLM
Genistin	Chr16:29178853:C:T	16	29178853	3.2e-20	MLM
Genistin	Chr16:29493860:C:T	16	29493860	9.79e-14	MLM
Genistin	Chr16:30186631:A:G	16	30186631	9.14e-27	MLM
Genistin	Chr16:30249894:A:G	16	30249894	1.95e-27	MLM
Genistin	Chr16:30378466:A:G	16	30378466	2.48e-10	MLM
Genistin	Chr16:30676060:A:T	16	30676060	6.48e-11	MLM
Genistin	Chr16:36144447:A:G	16	36144447	2.84e-25	MLM
Genistin	Chr16:37327748:A:G	16	37327748	1.72e-16	MLM
Genistin	Chr16:37434191:A:T	16	37434191	2.22e-14	MLM
Genistin	Chr16:4534021:C:T	16	4534021	1.2e-10	MLM
Genistin	Chr16:7641422:C:T	16	7641422	2.15e-12	MLM
Genistin	Chr16:7747600:A:G	16	7747600	2.84e-25	MLM
Genistin	Chr16:8470129:A:T	16	8470129	2.86e-09	MLM
Genistin	Chr17:14862383:A:T	17	14862383	4.64e-08	MLM
Genistin	Chr17:14862575:C:T	17	14862575	1.22e-16	MLM
Genistin	Chr17:15322202:A:C	17	15322202	4.49e-14	MLM
Genistin	Chr17:22541312:A:G	17	22541312	7.89e-11	MLM
Genistin	Chr17:22812028:C:T	17	22812028	2.43e-17	MLM
Genistin	Chr17:28573065:C:T	17	28573065	3.11e-15	MLM
Genistin	Chr17:3206952:C:T	17	3206952	6.41e-10	MLM
Genistin	Chr17:35415983:A:G	17	35415983	2.57e-12	MLM
Genistin	Chr17:37113568:A:G	17	37113568	1.5e-36	MLM
Genistin	Chr17:37317919:C:T	17	37317919	1.65e-19	MLM
Genistin	Chr18:12482618:C:T	18	12482618	4.22e-10	MLM
Genistin	Chr18:13288573:A:G	18	13288573	1.05e-09	MLM
Genistin	Chr18:14079353:G:T	18	14079353	1.31e-10	MLM
Genistin	Chr18:18150288:A:G	18	18150288	2.73e-10	MLM
Genistin	Chr18:20401564:A:G	18	20401564	3.74e-08	MLM
Genistin	Chr18:20424298:C:G	18	20424298	2.91e-08	MLM
Genistin	Chr18:20955601:G:T	18	20955601	7.42e-12	MLM
Genistin	Chr18:21840186:A:G	18	21840186	4.49e-08	MLM
Genistin	Chr18:23268040:A:G	18	23268040	3.77e-12	MLM
Genistin	Chr18:27006518:C:T	18	27006518	1.15e-08	MLM
Genistin	Chr18:27917971:C:T	18	27917971	2.96e-11	MLM
Genistin	Chr18:286249:A:T	18	286249	9.27e-13	MLM
Genistin	Chr18:35390442:C:T	18	35390442	4.9e-08	MLM
Genistin	Chr18:36062689:A:G	18	36062689	7.75e-112	MLM
Genistin	Chr18:36553877:C:T	18	36553877	1.58e-08	MLM
Genistin	Chr18:37906985:A:G	18	37906985	2.48e-11	MLM
Genistin	Chr18:38861368:C:T	18	38861368	4.49e-14	MLM
Genistin	Chr18:41625637:A:G	18	41625637	7.32e-55	MLM
Genistin	Chr18:41638598:C:T	18	41638598	1.4e-14	MLM
Genistin	Chr18:41653566:C:T	18	41653566	8.22e-09	MLM
Genistin	Chr18:45028234:A:G	18	45028234	4.96e-08	MLM
Genistin	Chr18:45105423:A:C	18	45105423	7.62e-10	MLM
Genistin	Chr18:46573260:A:G	18	46573260	2.83e-09	MLM
Genistin	Chr18:46643450:C:T	18	46643450	1.6e-10	MLM
Genistin	Chr18:46723096:C:T	18	46723096	3.23e-08	MLM
Genistin	Chr18:47917388:C:T	18	47917388	4.49e-14	MLM
Genistin	Chr18:48302296:C:T	18	48302296	1.25e-08	MLM
Genistin	Chr18:51371788:C:G	18	51371788	1.43e-08	MLM
Genistin	Chr18:52131353:A:G	18	52131353	4.78e-21	MLM
Genistin	Chr18:53149624:A:G	18	53149624	4.67e-17	MLM
Genistin	Chr18:55742516:C:T	18	55742516	2.76e-08	MLM
Genistin	Chr19:1673173:C:T	19	1673173	3.21e-29	MLM
Genistin	Chr19:18424000:A:G	19	18424000	1.55e-13	MLM
Genistin	Chr19:24515865:A:T	19	24515865	5.07e-11	MLM
Genistin	Chr19:27515422:A:G	19	27515422	1.46e-08	MLM
Genistin	Chr19:31826253:A:G	19	31826253	9.01e-22	MLM
Genistin	Chr19:32969035:A:G	19	32969035	4.22e-08	MLM
Genistin	Chr19:34512484:C:T	19	34512484	3.95e-13	MLM
Genistin	Chr19:42794125:A:T	19	42794125	2.85e-09	MLM
Genistin	Chr19:44445304:C:G	19	44445304	1.62e-09	MLM
Genistin	Chr19:48549255:A:G	19	48549255	4.8e-29	MLM
Genistin	Chr19:5438427:A:T	19	5438427	1.78e-09	MLM
Genistin	Chr19:5470429:C:T	19	5470429	1.1e-16	MLM
Genistin	Chr20:1107921:A:G	20	1107921	7.11e-16	MLM
Genistin	Chr20:24116232:A:G	20	24116232	9.08e-45	MLM
Genistin	Chr20:24127159:C:T	20	24127159	5.46e-10	MLM
Genistin	Chr20:255016:A:T	20	255016	3.51e-08	MLM
Genistin	Chr20:33193145:A:C	20	33193145	8.57e-92	MLM
Genistin	Chr20:33206227:C:T	20	33206227	1.41e-10	MLM
Genistin	Chr20:33338965:A:C	20	33338965	1.31e-15	MLM
Genistin	Chr20:34852421:A:G	20	34852421	4.5e-08	MLM
Genistin	Chr20:36762394:A:C	20	36762394	1.92e-10	MLM
Genistin	Chr20:36970628:C:T	20	36970628	6.7e-11	MLM
Genistin	Chr20:39307192:A:C	20	39307192	3.05e-11	MLM
Genistin	Chr20:46487915:C:T	20	46487915	7.05e-35	MLM
Genistin	Chr20:8291033:A:G	20	8291033	2.39e-09	MLM
Genistin	Chr03:31758815:A:G	3	31758815	4.96e-10	MLMM
Genistin	Chr07:15690617:A:G	7	15690617	1.19e-09	MLMM
Genistin	Chr10:43225961:C:T	10	43225961	1.61e-08	MLMM
Genistin	Chr20:34521942:C:G	20	34521942	2.7e-10	MLMM
Glycitin	Chr01:1389012:C:G	1	1389012	7.55e-10	Blink
Glycitin	Chr01:16552642:C:T	1	16552642	2.15e-35	Blink
Glycitin	Chr01:37735698:A:T	1	37735698	8.11e-16	Blink
Glycitin	Chr01:56697472:A:G	1	56697472	9.3e-26	Blink
Glycitin	Chr02:1281733:A:C	2	1281733	1e-12	Blink
Glycitin	Chr02:1617652:A:G	2	1617652	1.51e-34	Blink
Glycitin	Chr04:37681298:A:G	4	37681298	2.07e-50	Blink
Glycitin	Chr04:49426224:C:G	4	49426224	1.37e-13	Blink
Glycitin	Chr06:33112569:C:T	6	33112569	4.69e-23	Blink
Glycitin	Chr07:31740747:A:G	7	31740747	7.64e-11	Blink
Glycitin	Chr07:41747272:A:G	7	41747272	3.65e-08	Blink
Glycitin	Chr08:14016973:C:T	8	14016973	3.33e-08	Blink
Glycitin	Chr08:14283970:A:G	8	14283970	5.03e-25	Blink
Glycitin	Chr08:15669938:G:T	8	15669938	2.6e-11	Blink
Glycitin	Chr09:43630836:C:T	9	43630836	7.52e-09	Blink
Glycitin	Chr09:4656231:G:T	9	4656231	7.88e-24	Blink
Glycitin	Chr10:49431559:A:C	10	49431559	5.9e-10	Blink
Glycitin	Chr11:26800240:A:G	11	26800240	2.34e-09	Blink
Glycitin	Chr12:16897163:A:G	12	16897163	1.82e-12	Blink
Glycitin	Chr13:10108633:A:G	13	10108633	7.78e-31	Blink
Glycitin	Chr13:27845274:C:T	13	27845274	5.77e-27	Blink
Glycitin	Chr14:48885932:A:G	14	48885932	6.21e-44	Blink
Glycitin	Chr15:13883310:A:T	15	13883310	3.91e-11	Blink
Glycitin	Chr15:3180891:C:T	15	3180891	3.38e-14	Blink
Glycitin	Chr15:6482890:C:T	15	6482890	1.5e-44	Blink
Glycitin	Chr16:34129142:A:C	16	34129142	3.98e-14	Blink
Glycitin	Chr17:26568698:A:G	17	26568698	2.32e-13	Blink
Glycitin	Chr18:43405853:C:T	18	43405853	3.98e-14	Blink
Glycitin	Chr19:6222213:A:G	19	6222213	7.98e-09	Blink
Glycitin	Chr20:35463118:A:T	20	35463118	2.65e-11	Blink
Glycitin	Chr01:109039:A:G	1	109039	6.44e-14	FarmCPU
Glycitin	Chr01:2237373:C:T	1	2237373	8.89e-11	FarmCPU
Glycitin	Chr01:36117212:A:G	1	36117212	1.99e-08	FarmCPU
Glycitin	Chr04:37681298:A:G	4	37681298	5.77e-20	FarmCPU
Glycitin	Chr06:33112569:C:T	6	33112569	9.02e-09	FarmCPU
Glycitin	Chr07:42935100:A:T	7	42935100	4.26e-08	FarmCPU
Glycitin	Chr09:4656231:G:T	9	4656231	3.29e-16	FarmCPU
Glycitin	Chr09:4684644:A:G	9	4684644	2.72e-16	FarmCPU
Glycitin	Chr11:8196966:G:T	11	8196966	1.56e-09	FarmCPU
Glycitin	Chr11:8207972:C:T	11	8207972	3.11e-08	FarmCPU
Glycitin	Chr15:3173114:A:T	15	3173114	1.56e-12	FarmCPU
Glycitin	Chr15:3180891:C:T	15	3180891	4.03e-13	FarmCPU
Glycitin	Chr15:6482890:C:T	15	6482890	3.24e-25	FarmCPU
Glycitin	Chr16:36069498:C:T	16	36069498	3.89e-10	FarmCPU
Glycitin	Chr16:36090865:C:T	16	36090865	1.17e-09	FarmCPU
Glycitin	Chr02:5539031:A:T	2	5539031	7.96e-09	MLM
Glycitin	Chr03:29871907:G:T	3	29871907	1.87e-08	MLM
Glycitin	Chr03:29950448:A:G	3	29950448	7.91e-09	MLM
Glycitin	Chr03:30901352:A:G	3	30901352	4.78e-08	MLM
Glycitin	Chr03:7653138:G:T	3	7653138	7.27e-10	MLM
Glycitin	Chr03:7732973:C:G	3	7732973	1.83e-12	MLM
Glycitin	Chr03:8371988:A:C	3	8371988	4.21e-08	MLM
Glycitin	Chr04:1734994:A:T	4	1734994	8.7e-09	MLM
Glycitin	Chr04:26789538:A:G	4	26789538	2.6e-09	MLM
Glycitin	Chr04:27569967:A:G	4	27569967	4.67e-08	MLM
Glycitin	Chr04:28472900:A:G	4	28472900	4.81e-08	MLM
Glycitin	Chr04:28775668:C:T	4	28775668	2.57e-08	MLM
Glycitin	Chr04:29103364:A:G	4	29103364	5.01e-12	MLM
Glycitin	Chr04:29915778:C:T	4	29915778	1.01e-09	MLM
Glycitin	Chr04:30813411:A:G	4	30813411	4.5e-09	MLM
Glycitin	Chr04:32199791:C:T	4	32199791	2.72e-08	MLM
Glycitin	Chr04:32303107:C:T	4	32303107	2e-09	MLM
Glycitin	Chr04:32352756:C:T	4	32352756	6.8e-10	MLM
Glycitin	Chr04:33253938:A:G	4	33253938	1.4e-09	MLM
Glycitin	Chr04:33514983:A:G	4	33514983	4.59e-08	MLM
Glycitin	Chr04:33666775:A:G	4	33666775	9.55e-10	MLM
Glycitin	Chr04:34578757:C:G	4	34578757	4.02e-10	MLM
Glycitin	Chr04:35848537:C:T	4	35848537	5.2e-10	MLM
Glycitin	Chr04:36181320:A:G	4	36181320	3.06e-11	MLM
Glycitin	Chr04:36287136:A:G	4	36287136	5.83e-10	MLM
Glycitin	Chr04:36346102:C:T	4	36346102	3.09e-08	MLM
Glycitin	Chr04:37446278:C:T	4	37446278	2.44e-08	MLM
Glycitin	Chr04:37514397:G:T	4	37514397	2.2e-10	MLM
Glycitin	Chr04:37681298:A:G	4	37681298	1.91e-13	MLM
Glycitin	Chr04:37865606:C:T	4	37865606	8.29e-10	MLM
Glycitin	Chr04:37884431:C:T	4	37884431	9.76e-09	MLM
Glycitin	Chr04:38035798:C:T	4	38035798	1.09e-08	MLM
Glycitin	Chr04:38767770:A:T	4	38767770	1.61e-09	MLM
Glycitin	Chr04:38977794:C:T	4	38977794	1.61e-09	MLM
Glycitin	Chr04:38995245:G:T	4	38995245	1.3e-09	MLM
Glycitin	Chr04:39432514:A:C	4	39432514	3.08e-08	MLM
Glycitin	Chr04:40348512:C:T	4	40348512	3.79e-09	MLM
Glycitin	Chr04:40876533:A:G	4	40876533	6.4e-10	MLM
Glycitin	Chr04:41839001:C:T	4	41839001	1.01e-08	MLM
Glycitin	Chr04:41935100:C:T	4	41935100	2.33e-08	MLM
Glycitin	Chr04:46284358:C:T	4	46284358	2.95e-08	MLM
Glycitin	Chr04:5125483:A:G	4	5125483	3.17e-08	MLM
Glycitin	Chr04:51424454:A:C	4	51424454	4.13e-08	MLM
Glycitin	Chr04:51431420:A:G	4	51431420	2.54e-08	MLM
Glycitin	Chr05:8549017:A:G	5	8549017	1.24e-08	MLM
Glycitin	Chr06:1798344:C:T	6	1798344	1.02e-11	MLM
Glycitin	Chr06:45026529:A:G	6	45026529	7.11e-09	MLM
Glycitin	Chr06:45239967:C:T	6	45239967	9.13e-10	MLM
Glycitin	Chr09:4613848:C:G	9	4613848	2.65e-11	MLM
Glycitin	Chr09:4629891:A:T	9	4629891	2e-09	MLM
Glycitin	Chr09:4635058:A:T	9	4635058	2.22e-09	MLM
Glycitin	Chr09:4652685:C:T	9	4652685	1.41e-08	MLM
Glycitin	Chr09:4656231:G:T	9	4656231	1.97e-12	MLM
Glycitin	Chr09:4658795:C:T	9	4658795	1.97e-10	MLM
Glycitin	Chr09:4672678:A:G	9	4672678	1.11e-08	MLM
Glycitin	Chr09:4684644:A:G	9	4684644	4.6e-11	MLM
Glycitin	Chr09:4686616:C:T	9	4686616	1.18e-09	MLM
Glycitin	Chr09:4701408:A:G	9	4701408	1.76e-09	MLM
Glycitin	Chr09:49548338:A:C	9	49548338	4.05e-08	MLM
Glycitin	Chr13:10108633:A:G	13	10108633	1.96e-11	MLM
Glycitin	Chr13:10736041:A:G	13	10736041	8.31e-12	MLM
Glycitin	Chr13:11240279:A:G	13	11240279	1.33e-08	MLM
Glycitin	Chr13:11385802:A:T	13	11385802	2.88e-09	MLM
Glycitin	Chr13:123582:C:T	13	123582	1.5e-08	MLM
Glycitin	Chr13:12403523:A:G	13	12403523	1.59e-08	MLM
Glycitin	Chr13:12623906:A:G	13	12623906	1.06e-09	MLM
Glycitin	Chr13:12747095:G:T	13	12747095	1.77e-08	MLM
Glycitin	Chr13:13645086:A:G	13	13645086	1.99e-09	MLM
Glycitin	Chr13:13659000:A:G	13	13659000	1.06e-10	MLM
Glycitin	Chr13:155712:C:T	13	155712	8.89e-09	MLM
Glycitin	Chr13:1722722:C:T	13	1722722	1.02e-10	MLM
Glycitin	Chr13:27845274:C:T	13	27845274	1.23e-10	MLM
Glycitin	Chr13:28242832:A:T	13	28242832	2.18e-10	MLM
Glycitin	Chr13:28256714:A:G	13	28256714	4.42e-08	MLM
Glycitin	Chr13:28295442:G:T	13	28295442	9.81e-09	MLM
Glycitin	Chr13:28431532:A:G	13	28431532	1.97e-08	MLM
Glycitin	Chr13:28578286:C:T	13	28578286	2.08e-08	MLM
Glycitin	Chr13:28610610:A:G	13	28610610	3.44e-08	MLM
Glycitin	Chr13:6848699:A:G	13	6848699	1.51e-10	MLM
Glycitin	Chr13:7728900:C:T	13	7728900	7.4e-13	MLM
Glycitin	Chr14:43553981:A:T	14	43553981	1.33e-08	MLM
Glycitin	Chr15:431422:A:C	15	431422	2.19e-09	MLM
Glycitin	Chr15:49752214:C:T	15	49752214	1.39e-09	MLM
Glycitin	Chr15:49753401:A:G	15	49753401	1.4e-08	MLM
Glycitin	Chr16:27417092:A:G	16	27417092	8.44e-12	MLM
Glycitin	Chr16:32681087:G:T	16	32681087	4.06e-08	MLM
Glycitin	Chr16:34141604:A:G	16	34141604	3.06e-08	MLM
Glycitin	Chr16:36069498:C:T	16	36069498	1.74e-10	MLM
Glycitin	Chr16:36507395:A:T	16	36507395	3.45e-09	MLM
Glycitin	Chr17:38863023:A:G	17	38863023	2.07e-11	MLM
Glycitin	Chr17:40183120:A:G	17	40183120	2.99e-08	MLM
Glycitin	Chr17:40187087:A:T	17	40187087	4.35e-08	MLM
Glycitin	Chr17:4199484:A:G	17	4199484	6.86e-10	MLM
Glycitin	Chr18:1917267:C:T	18	1917267	3.57e-09	MLM
Glycitin	Chr18:2138965:A:C	18	2138965	2.29e-13	MLM
Glycitin	Chr18:2578939:A:G	18	2578939	5.74e-09	MLM
Glycitin	Chr18:38533060:A:G	18	38533060	2.24e-08	MLM
Glycitin	Chr18:38946245:A:C	18	38946245	4.35e-08	MLM
Glycitin	Chr18:40462076:A:G	18	40462076	4.73e-08	MLM
Glycitin	Chr18:4059639:G:T	18	4059639	1.29e-09	MLM
Glycitin	Chr18:41404121:C:T	18	41404121	1.2e-09	MLM
Glycitin	Chr18:440590:A:G	18	440590	2.24e-08	MLM
Glycitin	Chr18:49748468:C:T	18	49748468	1.93e-08	MLM
Glycitin	Chr18:6945489:A:G	18	6945489	2.43e-11	MLM
Glycitin	Chr18:965331:A:C	18	965331	1.43e-09	MLM
Glycitin	Chr19:46562685:A:G	19	46562685	2.54e-08	MLM
Glycitin	Chr04:37681298:A:G	4	37681298	3.74e-35	MLMM
Glycitin	Chr05:11378204:C:T	5	11378204	8.5e-15	MLMM
Glycitin	Chr11:8194119:A:C	11	8194119	2.76e-08	MLMM
Glycitin	Chr12:18564409:A:G	12	18564409	8.62e-12	MLMM
Glycitin	Chr13:2361342:A:G	13	2361342	1.49e-09	MLMM
Glycitin	Chr17:2885405:A:C	17	2885405	7.06e-17	MLMM
Glycitin	Chr18:41404121:C:T	18	41404121	1.5e-12	MLMM
Glycitin	Chr19:33629840:A:G	19	33629840	3.86e-22	MLMM
Glycitin	Chr20:2182726:G:T	20	2182726	3.95e-26	MLMM
Malonyl daidzin	Chr01:41474024:C:G	1	41474024	4.18e-08	Blink
Malonyl daidzin	Chr02:5543932:A:C	2	5543932	1.29e-13	Blink
Malonyl daidzin	Chr04:2240055:G:T	4	2240055	5.52e-09	Blink
Malonyl daidzin	Chr04:41974464:G:T	4	41974464	2.52e-11	Blink
Malonyl daidzin	Chr05:3376030:C:G	5	3376030	2.58e-10	Blink
Malonyl daidzin	Chr05:6390474:C:T	5	6390474	2.4e-09	Blink
Malonyl daidzin	Chr09:44081448:C:T	9	44081448	4.6e-09	Blink
Malonyl daidzin	Chr16:30950699:A:G	16	30950699	2.18e-08	Blink
Malonyl daidzin	Chr04:16662514:A:G	4	16662514	1e-08	FarmCPU
Malonyl daidzin	Chr04:2240055:G:T	4	2240055	3.59e-08	FarmCPU
Malonyl daidzin	Chr05:33233600:C:T	5	33233600	4.02e-08	FarmCPU
Malonyl daidzin	Chr16:30950699:A:G	16	30950699	1.1e-12	FarmCPU
Malonyl daidzin	Chr16:31021885:C:T	16	31021885	1.23e-13	FarmCPU
Malonyl daidzin	Chr04:47874552:G:T	4	47874552	6.19e-12	MLMM
Malonyl daidzin	Chr16:30950699:A:G	16	30950699	6.39e-11	MLMM
Malonyl daidzin	Chr01:36041785:C:G	1	36041785	2.15e-08	MLM
Malonyl daidzin	Chr16:30950699:A:G	16	30950699	5.71e-09	MLM
Malonyl glycitin	Chr01:2395502:C:T	1	2395502	1.45e-08	MLM
Malonyl glycitin	Chr01:27452947:A:G	1	27452947	3.97e-09	MLM
Malonyl glycitin	Chr01:45824778:C:T	1	45824778	6.78e-09	MLM
Malonyl glycitin	Chr01:46358236:A:G	1	46358236	7.45e-09	MLM
Malonyl glycitin	Chr02:1617652:A:G	2	1617652	4.78e-58	MLM
Malonyl glycitin	Chr02:1954162:A:G	2	1954162	1.26e-11	MLM
Malonyl glycitin	Chr02:2439462:A:G	2	2439462	4.83e-12	MLM
Malonyl glycitin	Chr02:4106785:C:T	2	4106785	2.11e-11	MLM
Malonyl glycitin	Chr02:4409469:A:G	2	4409469	1.71e-09	MLM
Malonyl glycitin	Chr02:4910562:A:C	2	4910562	2.83e-08	MLM
Malonyl glycitin	Chr02:5539031:A:T	2	5539031	4e-11	MLM
Malonyl glycitin	Chr02:5543932:A:C	2	5543932	1.67e-08	MLM
Malonyl glycitin	Chr02:5551404:A:T	2	5551404	1.61e-08	MLM
Malonyl glycitin	Chr02:6035207:C:T	2	6035207	1.29e-10	MLM
Malonyl glycitin	Chr02:7528309:A:T	2	7528309	1.55e-08	MLM
Malonyl glycitin	Chr03:10764633:C:T	3	10764633	5.36e-12	MLM
Malonyl glycitin	Chr03:17492322:C:T	3	17492322	7.23e-11	MLM
Malonyl glycitin	Chr03:29734141:C:T	3	29734141	4.26e-08	MLM
Malonyl glycitin	Chr03:29837290:C:T	3	29837290	2.35e-22	MLM
Malonyl glycitin	Chr03:29851933:A:G	3	29851933	7.79e-09	MLM
Malonyl glycitin	Chr03:3113501:A:G	3	3113501	3.97e-09	MLM
Malonyl glycitin	Chr03:41930692:C:T	3	41930692	3.13e-08	MLM
Malonyl glycitin	Chr03:41946232:A:G	3	41946232	3.64e-10	MLM
Malonyl glycitin	Chr03:7732973:C:G	3	7732973	7.05e-09	MLM
Malonyl glycitin	Chr03:9313797:A:G	3	9313797	1.38e-09	MLM
Malonyl glycitin	Chr04:11897096:C:T	4	11897096	3.97e-09	MLM
Malonyl glycitin	Chr04:26789538:A:G	4	26789538	6.58e-09	MLM
Malonyl glycitin	Chr04:28775668:C:T	4	28775668	1.31e-09	MLM
Malonyl glycitin	Chr04:29103364:A:G	4	29103364	7.57e-10	MLM
Malonyl glycitin	Chr04:32352756:C:T	4	32352756	1.54e-09	MLM
Malonyl glycitin	Chr04:32780286:C:T	4	32780286	4.1e-28	MLM
Malonyl glycitin	Chr04:33253938:A:G	4	33253938	2.11e-08	MLM
Malonyl glycitin	Chr04:33666775:A:G	4	33666775	8.08e-09	MLM
Malonyl glycitin	Chr04:36181320:A:G	4	36181320	1.44e-08	MLM
Malonyl glycitin	Chr04:36346102:C:T	4	36346102	2.29e-08	MLM
Malonyl glycitin	Chr04:37514397:G:T	4	37514397	1.24e-08	MLM
Malonyl glycitin	Chr04:37681298:A:G	4	37681298	1.23e-12	MLM
Malonyl glycitin	Chr04:39432514:A:C	4	39432514	4.41e-08	MLM
Malonyl glycitin	Chr04:40876533:A:G	4	40876533	2.01e-09	MLM
Malonyl glycitin	Chr04:46284358:C:T	4	46284358	1.4e-08	MLM
Malonyl glycitin	Chr05:11378204:C:T	5	11378204	4.19e-16	MLM
Malonyl glycitin	Chr05:22381828:C:T	5	22381828	1.32e-19	MLM
Malonyl glycitin	Chr05:31649781:C:T	5	31649781	6.82e-36	MLM
Malonyl glycitin	Chr05:5207695:C:T	5	5207695	2.72e-21	MLM
Malonyl glycitin	Chr05:5885972:A:G	5	5885972	7.06e-15	MLM
Malonyl glycitin	Chr05:7605521:C:T	5	7605521	1.71e-09	MLM
Malonyl glycitin	Chr05:8549017:A:G	5	8549017	8.04e-09	MLM
Malonyl glycitin	Chr05:9462788:C:T	5	9462788	1.26e-15	MLM
Malonyl glycitin	Chr06:36653372:C:T	6	36653372	1.33e-09	MLM
Malonyl glycitin	Chr06:45026529:A:G	6	45026529	5.1e-08	MLM
Malonyl glycitin	Chr06:488196:A:G	6	488196	2.72e-21	MLM
Malonyl glycitin	Chr07:10541811:C:T	7	10541811	1.25e-12	MLM
Malonyl glycitin	Chr07:10815031:C:T	7	10815031	4.46e-08	MLM
Malonyl glycitin	Chr07:11179940:C:T	7	11179940	3.65e-08	MLM
Malonyl glycitin	Chr07:13079513:G:T	7	13079513	2.72e-21	MLM
Malonyl glycitin	Chr07:2962371:A:T	7	2962371	2.7e-08	MLM
Malonyl glycitin	Chr07:29749064:C:T	7	29749064	5.52e-09	MLM
Malonyl glycitin	Chr07:31117105:C:T	7	31117105	2.04e-10	MLM
Malonyl glycitin	Chr07:3561343:G:T	7	3561343	1.71e-09	MLM
Malonyl glycitin	Chr07:39592648:A:T	7	39592648	8.9e-09	MLM
Malonyl glycitin	Chr07:6720175:G:T	7	6720175	9.04e-09	MLM
Malonyl glycitin	Chr07:8112480:A:T	7	8112480	4.53e-08	MLM
Malonyl glycitin	Chr08:1929561:C:G	8	1929561	4.69e-10	MLM
Malonyl glycitin	Chr08:21755338:C:T	8	21755338	9.74e-09	MLM
Malonyl glycitin	Chr08:25931499:A:G	8	25931499	3.68e-08	MLM
Malonyl glycitin	Chr08:35891016:C:T	8	35891016	2.72e-21	MLM
Malonyl glycitin	Chr08:39091744:A:G	8	39091744	2.68e-17	MLM
Malonyl glycitin	Chr09:17596338:A:G	9	17596338	1.88e-08	MLM
Malonyl glycitin	Chr09:33812230:C:T	9	33812230	9.39e-10	MLM
Malonyl glycitin	Chr09:33938616:A:G	9	33938616	7.8e-28	MLM
Malonyl glycitin	Chr09:4613848:C:G	9	4613848	2.4e-08	MLM
Malonyl glycitin	Chr09:4656231:G:T	9	4656231	6.23e-09	MLM
Malonyl glycitin	Chr10:11580948:A:G	10	11580948	1.48e-09	MLM
Malonyl glycitin	Chr10:16504669:C:T	10	16504669	4.19e-08	MLM
Malonyl glycitin	Chr10:43420887:G:T	10	43420887	4.31e-08	MLM
Malonyl glycitin	Chr10:5313669:A:C	10	5313669	3.22e-139	MLM
Malonyl glycitin	Chr10:5468954:C:T	10	5468954	3.88e-12	MLM
Malonyl glycitin	Chr10:5996485:A:G	10	5996485	5.02e-10	MLM
Malonyl glycitin	Chr10:6801686:C:T	10	6801686	1.89e-09	MLM
Malonyl glycitin	Chr10:9339284:C:T	10	9339284	3.92e-08	MLM
Malonyl glycitin	Chr11:12260291:C:T	11	12260291	1.57e-11	MLM
Malonyl glycitin	Chr11:18882480:C:T	11	18882480	8.75e-22	MLM
Malonyl glycitin	Chr11:25954867:A:T	11	25954867	4.61e-08	MLM
Malonyl glycitin	Chr11:28773460:C:T	11	28773460	1.28e-11	MLM
Malonyl glycitin	Chr11:7869905:C:T	11	7869905	1.87e-10	MLM
Malonyl glycitin	Chr11:8167113:A:T	11	8167113	2e-08	MLM
Malonyl glycitin	Chr11:8181201:C:T	11	8181201	1.17e-08	MLM
Malonyl glycitin	Chr11:8194119:A:C	11	8194119	1.57e-08	MLM
Malonyl glycitin	Chr11:8196966:G:T	11	8196966	7.07e-10	MLM
Malonyl glycitin	Chr11:8207972:C:T	11	8207972	5.03e-10	MLM
Malonyl glycitin	Chr11:8220836:G:T	11	8220836	1.25e-09	MLM
Malonyl glycitin	Chr11:8235231:A:G	11	8235231	7.07e-09	MLM
Malonyl glycitin	Chr11:8238232:C:T	11	8238232	6.54e-10	MLM
Malonyl glycitin	Chr11:8250034:C:T	11	8250034	1.97e-09	MLM
Malonyl glycitin	Chr11:8252184:C:T	11	8252184	2.63e-09	MLM
Malonyl glycitin	Chr11:8259013:A:G	11	8259013	4.22e-10	MLM
Malonyl glycitin	Chr11:8270929:G:T	11	8270929	5.52e-09	MLM
Malonyl glycitin	Chr11:8583319:C:T	11	8583319	1.2e-12	MLM
Malonyl glycitin	Chr12:1148608:A:G	12	1148608	1.58e-09	MLM
Malonyl glycitin	Chr12:30556644:A:G	12	30556644	3.59e-08	MLM
Malonyl glycitin	Chr13:10108633:A:G	13	10108633	1.86e-12	MLM
Malonyl glycitin	Chr13:10191835:C:T	13	10191835	3.51e-09	MLM
Malonyl glycitin	Chr13:10241767:C:T	13	10241767	2.3e-08	MLM
Malonyl glycitin	Chr13:10361803:C:T	13	10361803	2.76e-08	MLM
Malonyl glycitin	Chr13:10424468:G:T	13	10424468	1.78e-08	MLM
Malonyl glycitin	Chr13:10440399:C:T	13	10440399	2.85e-08	MLM
Malonyl glycitin	Chr13:10697048:C:G	13	10697048	1.24e-08	MLM
Malonyl glycitin	Chr13:10731232:A:G	13	10731232	5.73e-10	MLM
Malonyl glycitin	Chr13:10736041:A:G	13	10736041	2.96e-08	MLM
Malonyl glycitin	Chr13:11385802:A:T	13	11385802	8.41e-14	MLM
Malonyl glycitin	Chr13:11548963:A:G	13	11548963	9.97e-09	MLM
Malonyl glycitin	Chr13:11650715:A:T	13	11650715	3.22e-08	MLM
Malonyl glycitin	Chr13:11786727:C:T	13	11786727	2.39e-10	MLM
Malonyl glycitin	Chr13:1180222:C:T	13	1180222	3.34e-10	MLM
Malonyl glycitin	Chr13:11802889:C:T	13	11802889	8.24e-09	MLM
Malonyl glycitin	Chr13:12011330:A:G	13	12011330	6.37e-12	MLM
Malonyl glycitin	Chr13:12179239:A:G	13	12179239	4.85e-08	MLM
Malonyl glycitin	Chr13:123582:C:T	13	123582	1.83e-09	MLM
Malonyl glycitin	Chr13:12403523:A:G	13	12403523	2.14e-09	MLM
Malonyl glycitin	Chr13:12616386:A:G	13	12616386	1.06e-12	MLM
Malonyl glycitin	Chr13:12623906:A:G	13	12623906	2.27e-09	MLM
Malonyl glycitin	Chr13:12747095:G:T	13	12747095	4.15e-09	MLM
Malonyl glycitin	Chr13:12863263:C:T	13	12863263	3.61e-10	MLM
Malonyl glycitin	Chr13:12911659:C:T	13	12911659	2.59e-08	MLM
Malonyl glycitin	Chr13:13068959:A:C	13	13068959	1.49e-08	MLM
Malonyl glycitin	Chr13:13645086:A:G	13	13645086	3.78e-09	MLM
Malonyl glycitin	Chr13:13659000:A:G	13	13659000	1.54e-09	MLM
Malonyl glycitin	Chr13:13707015:A:C	13	13707015	1.43e-09	MLM
Malonyl glycitin	Chr13:13781031:A:G	13	13781031	1.42e-10	MLM
Malonyl glycitin	Chr13:13857618:A:G	13	13857618	2.99e-08	MLM
Malonyl glycitin	Chr13:1560791:C:T	13	1560791	1.52e-09	MLM
Malonyl glycitin	Chr13:1697438:C:G	13	1697438	1.09e-09	MLM
Malonyl glycitin	Chr13:1874383:A:G	13	1874383	2.56e-16	MLM
Malonyl glycitin	Chr13:18843031:C:T	13	18843031	3.97e-09	MLM
Malonyl glycitin	Chr13:20306589:A:T	13	20306589	4.85e-08	MLM
Malonyl glycitin	Chr13:2085398:A:T	13	2085398	3.52e-09	MLM
Malonyl glycitin	Chr13:210221:A:G	13	210221	2.22e-19	MLM
Malonyl glycitin	Chr13:2181958:A:C	13	2181958	2.87e-08	MLM
Malonyl glycitin	Chr13:27845274:C:T	13	27845274	7.51e-10	MLM
Malonyl glycitin	Chr13:28242832:A:T	13	28242832	1.08e-09	MLM
Malonyl glycitin	Chr13:28562762:C:T	13	28562762	8.81e-09	MLM
Malonyl glycitin	Chr13:28578286:C:T	13	28578286	2.04e-10	MLM
Malonyl glycitin	Chr13:28588961:C:T	13	28588961	3.34e-08	MLM
Malonyl glycitin	Chr13:28610610:A:G	13	28610610	3.95e-08	MLM
Malonyl glycitin	Chr13:28630023:G:T	13	28630023	1.25e-08	MLM
Malonyl glycitin	Chr13:28790951:A:G	13	28790951	1.7e-11	MLM
Malonyl glycitin	Chr13:28800007:A:T	13	28800007	2.1e-09	MLM
Malonyl glycitin	Chr13:290235:A:G	13	290235	9.77e-09	MLM
Malonyl glycitin	Chr13:29194476:G:T	13	29194476	1.07e-10	MLM
Malonyl glycitin	Chr13:326911:A:C	13	326911	1.07e-08	MLM
Malonyl glycitin	Chr13:32997184:C:G	13	32997184	3.64e-08	MLM
Malonyl glycitin	Chr13:445692:A:G	13	445692	7.94e-14	MLM
Malonyl glycitin	Chr13:4715282:A:G	13	4715282	3.2e-08	MLM
Malonyl glycitin	Chr13:4757345:A:G	13	4757345	1.34e-09	MLM
Malonyl glycitin	Chr13:5353224:A:G	13	5353224	6.19e-09	MLM
Malonyl glycitin	Chr13:5473457:C:T	13	5473457	1.67e-11	MLM
Malonyl glycitin	Chr13:5802086:A:G	13	5802086	4.84e-08	MLM
Malonyl glycitin	Chr13:5959065:A:G	13	5959065	1.72e-09	MLM
Malonyl glycitin	Chr13:648588:C:T	13	648588	1.92e-11	MLM
Malonyl glycitin	Chr13:652728:A:G	13	652728	4.01e-08	MLM
Malonyl glycitin	Chr13:6848699:A:G	13	6848699	2.02e-08	MLM
Malonyl glycitin	Chr13:705522:A:T	13	705522	2.74e-08	MLM
Malonyl glycitin	Chr13:7389237:A:G	13	7389237	3.33e-10	MLM
Malonyl glycitin	Chr13:7451011:A:G	13	7451011	4.04e-10	MLM
Malonyl glycitin	Chr13:774162:A:G	13	774162	1.14e-10	MLM
Malonyl glycitin	Chr13:8074077:C:T	13	8074077	2.05e-09	MLM
Malonyl glycitin	Chr13:8532840:A:G	13	8532840	7.18e-11	MLM
Malonyl glycitin	Chr13:8595214:C:T	13	8595214	3.89e-08	MLM
Malonyl glycitin	Chr13:8730560:C:T	13	8730560	6.04e-09	MLM
Malonyl glycitin	Chr13:8753537:C:T	13	8753537	4.49e-08	MLM
Malonyl glycitin	Chr13:895365:A:C	13	895365	8.83e-10	MLM
Malonyl glycitin	Chr13:9393222:A:G	13	9393222	8.61e-11	MLM
Malonyl glycitin	Chr13:9704788:C:T	13	9704788	2.66e-09	MLM
Malonyl glycitin	Chr13:9714803:C:G	13	9714803	4.88e-08	MLM
Malonyl glycitin	Chr13:9960417:C:T	13	9960417	4.61e-08	MLM
Malonyl glycitin	Chr13:9972147:G:T	13	9972147	4.75e-11	MLM
Malonyl glycitin	Chr14:23218391:A:G	14	23218391	2.72e-21	MLM
Malonyl glycitin	Chr14:26784118:C:T	14	26784118	1.85e-08	MLM
Malonyl glycitin	Chr14:42818875:C:G	14	42818875	9e-12	MLM
Malonyl glycitin	Chr14:43082956:A:G	14	43082956	3.57e-22	MLM
Malonyl glycitin	Chr14:43189041:A:C	14	43189041	3.87e-10	MLM
Malonyl glycitin	Chr14:43257028:C:T	14	43257028	4.55e-12	MLM
Malonyl glycitin	Chr14:48885932:A:G	14	48885932	2.94e-10	MLM
Malonyl glycitin	Chr15:17946694:C:T	15	17946694	9.24e-23	MLM
Malonyl glycitin	Chr15:18807548:C:T	15	18807548	5.56e-10	MLM
Malonyl glycitin	Chr15:19391869:A:G	15	19391869	9.14e-11	MLM
Malonyl glycitin	Chr15:22410249:A:G	15	22410249	2.46e-19	MLM
Malonyl glycitin	Chr15:49434602:A:G	15	49434602	4.01e-10	MLM
Malonyl glycitin	Chr15:49752214:C:T	15	49752214	4.07e-08	MLM
Malonyl glycitin	Chr15:49753401:A:G	15	49753401	4.05e-08	MLM
Malonyl glycitin	Chr15:49783754:C:T	15	49783754	1.68e-08	MLM
Malonyl glycitin	Chr15:7587473:A:G	15	7587473	1.97e-13	MLM
Malonyl glycitin	Chr16:27150869:C:T	16	27150869	7.05e-09	MLM
Malonyl glycitin	Chr16:27334950:A:G	16	27334950	3.28e-08	MLM
Malonyl glycitin	Chr16:27417092:A:G	16	27417092	1.38e-15	MLM
Malonyl glycitin	Chr16:27514243:C:T	16	27514243	1.01e-08	MLM
Malonyl glycitin	Chr16:30950699:A:G	16	30950699	4.68e-09	MLM
Malonyl glycitin	Chr16:32681087:G:T	16	32681087	3.28e-08	MLM
Malonyl glycitin	Chr16:34091035:A:G	16	34091035	1.71e-08	MLM
Malonyl glycitin	Chr16:36033834:C:T	16	36033834	8.31e-15	MLM
Malonyl glycitin	Chr16:36069498:C:T	16	36069498	7.28e-11	MLM
Malonyl glycitin	Chr16:36149036:A:T	16	36149036	3.99e-09	MLM
Malonyl glycitin	Chr16:36151086:C:T	16	36151086	5.7e-09	MLM
Malonyl glycitin	Chr16:36498652:C:T	16	36498652	8.07e-20	MLM
Malonyl glycitin	Chr17:1367962:A:G	17	1367962	1.12e-17	MLM
Malonyl glycitin	Chr17:5919832:C:T	17	5919832	4.53e-08	MLM
Malonyl glycitin	Chr18:1051335:A:T	18	1051335	2.28e-08	MLM
Malonyl glycitin	Chr18:16394505:C:T	18	16394505	2.72e-21	MLM
Malonyl glycitin	Chr18:17353535:C:T	18	17353535	3.03e-08	MLM
Malonyl glycitin	Chr18:1800787:A:G	18	1800787	4.3e-08	MLM
Malonyl glycitin	Chr18:1862104:G:T	18	1862104	4.63e-09	MLM
Malonyl glycitin	Chr18:1872321:A:C	18	1872321	2.62e-08	MLM
Malonyl glycitin	Chr18:2010877:G:T	18	2010877	6.52e-09	MLM
Malonyl glycitin	Chr18:2138965:A:C	18	2138965	4.18e-22	MLM
Malonyl glycitin	Chr18:2190566:C:T	18	2190566	4.34e-08	MLM
Malonyl glycitin	Chr18:22767441:C:T	18	22767441	1.6e-21	MLM
Malonyl glycitin	Chr18:2887196:C:G	18	2887196	3.54e-09	MLM
Malonyl glycitin	Chr18:2965046:A:G	18	2965046	1.38e-08	MLM
Malonyl glycitin	Chr18:36427921:A:G	18	36427921	2.42e-09	MLM
Malonyl glycitin	Chr18:3923645:A:T	18	3923645	6.98e-09	MLM
Malonyl glycitin	Chr18:4059639:G:T	18	4059639	2e-09	MLM
Malonyl glycitin	Chr18:41029650:A:G	18	41029650	2.92e-14	MLM
Malonyl glycitin	Chr18:42678993:A:C	18	42678993	5.35e-10	MLM
Malonyl glycitin	Chr18:42963173:A:G	18	42963173	9.33e-09	MLM
Malonyl glycitin	Chr18:43405853:C:T	18	43405853	1.99e-09	MLM
Malonyl glycitin	Chr18:43415762:G:T	18	43415762	4.21e-20	MLM
Malonyl glycitin	Chr18:43615:C:G	18	43615	2.71e-09	MLM
Malonyl glycitin	Chr18:440590:A:G	18	440590	4.67e-10	MLM
Malonyl glycitin	Chr18:478271:A:G	18	478271	4.16e-08	MLM
Malonyl glycitin	Chr18:48640751:A:G	18	48640751	2.14e-08	MLM
Malonyl glycitin	Chr18:49175683:A:G	18	49175683	7e-09	MLM
Malonyl glycitin	Chr18:49288456:A:G	18	49288456	1.48e-09	MLM
Malonyl glycitin	Chr18:49748468:C:T	18	49748468	1.73e-08	MLM
Malonyl glycitin	Chr18:49898985:A:G	18	49898985	3.05e-10	MLM
Malonyl glycitin	Chr18:49900167:A:G	18	49900167	8.23e-09	MLM
Malonyl glycitin	Chr18:529017:A:T	18	529017	3.84e-15	MLM
Malonyl glycitin	Chr18:548208:C:T	18	548208	2.99e-10	MLM
Malonyl glycitin	Chr18:6261974:A:T	18	6261974	1.61e-08	MLM
Malonyl glycitin	Chr18:67573:C:T	18	67573	4.76e-10	MLM
Malonyl glycitin	Chr18:7036873:A:G	18	7036873	1.64e-15	MLM
Malonyl glycitin	Chr18:785809:C:T	18	785809	2.3e-09	MLM
Malonyl glycitin	Chr18:856412:C:T	18	856412	2.52e-09	MLM
Malonyl glycitin	Chr18:861903:A:G	18	861903	3.89e-09	MLM
Malonyl glycitin	Chr18:914491:G:T	18	914491	2.14e-10	MLM
Malonyl glycitin	Chr18:965331:A:C	18	965331	7.98e-09	MLM
Malonyl glycitin	Chr20:2985411:A:T	20	2985411	1.12e-14	MLM
Malonyl glycitin	Chr20:47733163:C:T	20	47733163	3.91e-08	MLM
Malonyl glycitin	Chr07:29606710:A:G	7	29606710	9.99e-10	MLMM
Malonyl glycitin	Chr09:19707225:C:T	9	19707225	1.07e-11	MLMM
Malonyl glycitin	Chr11:8259013:A:G	11	8259013	2.63e-14	MLMM
Malonyl glycitin	Chr13:28578286:C:T	13	28578286	3.98e-12	MLMM
Malonyl glycitin	Chr13:44271682:A:C	13	44271682	1.7e-08	MLMM
Malonyl glycitin	Chr18:2138965:A:C	18	2138965	2.84e-16	MLMM

## Sheet: Table S3
Supplementary Table S3. Significant SNPs associated with soyasaponin metabolites.
Metabolite	SNP	CHR	Position	P_value	GWAS method
Soyasaponin aa	Chr01:10644931:C:T	1	10644931	2.51e-21	Blink
Soyasaponin aa	Chr01:13308999:A:T	1	13308999	2.51e-19	Blink
Soyasaponin aa	Chr01:25878549:A:G	1	25878549	1.12e-09	Blink
Soyasaponin aa	Chr01:30224885:C:T	1	30224885	2.51e-21	Blink
Soyasaponin aa	Chr01:36678490:A:C	1	36678490	2.51e-21	Blink
Soyasaponin aa	Chr01:8935674:A:G	1	8935674	2.51e-21	Blink
Soyasaponin aa	Chr01:9213430:C:T	1	9213430	2.72e-19	Blink
Soyasaponin aa	Chr02:5987597:C:T	2	5987597	2.51e-21	Blink
Soyasaponin aa	Chr02:6669396:A:G	2	6669396	4.92e-10	Blink
Soyasaponin aa	Chr03:41908937:C:T	3	41908937	1.02e-14	Blink
Soyasaponin aa	Chr05:6536275:A:G	5	6536275	1.63e-13	Blink
Soyasaponin aa	Chr06:17966177:C:T	6	17966177	4.01e-16	Blink
Soyasaponin aa	Chr07:42124839:A:C	7	42124839	2.51e-21	Blink
Soyasaponin aa	Chr07:43134737:A:G	7	43134737	2.51e-21	Blink
Soyasaponin aa	Chr07:43271899:C:T	7	43271899	6.27e-19	Blink
Soyasaponin aa	Chr12:2442972:A:G	12	2442972	2.51e-21	Blink
Soyasaponin aa	Chr15:17949582:C:T	15	17949582	3.85e-13	Blink
Soyasaponin aa	Chr15:19342069:A:G	15	19342069	5.36e-11	Blink
Soyasaponin aa	Chr16:21937964:A:G	16	21937964	9.79e-09	Blink
Soyasaponin aa	Chr18:43709235:C:T	18	43709235	4.19e-08	Blink
Soyasaponin aa	Chr01:10690289:C:T	1	10690289	3.82e-09	MLM
Soyasaponin aa	Chr01:30903393:C:T	1	30903393	1.24e-14	MLM
Soyasaponin aa	Chr01:35413308:A:G	1	35413308	3.5e-14	MLM
Soyasaponin aa	Chr01:36084764:C:T	1	36084764	2.06e-08	MLM
Soyasaponin aa	Chr01:39874250:C:T	1	39874250	2.59e-13	MLM
Soyasaponin aa	Chr01:44592824:C:T	1	44592824	7.61e-10	MLM
Soyasaponin aa	Chr01:44633759:A:G	1	44633759	3.63e-08	MLM
Soyasaponin aa	Chr01:51265237:A:G	1	51265237	3.34e-11	MLM
Soyasaponin aa	Chr01:5905557:C:T	1	5905557	1.13e-08	MLM
Soyasaponin aa	Chr01:9621541:A:G	1	9621541	4.4e-11	MLM
Soyasaponin aa	Chr02:14295819:A:T	2	14295819	1.29e-25	MLM
Soyasaponin aa	Chr02:44460842:C:T	2	44460842	9.77e-13	MLM
Soyasaponin aa	Chr02:45992028:A:C	2	45992028	2.13e-42	MLM
Soyasaponin aa	Chr02:48549119:A:G	2	48549119	6.99e-16	MLM
Soyasaponin aa	Chr02:561460:C:T	2	561460	4.77e-13	MLM
Soyasaponin aa	Chr02:6025355:A:C	2	6025355	2.84e-09	MLM
Soyasaponin aa	Chr02:7071441:C:T	2	7071441	3.48e-13	MLM
Soyasaponin aa	Chr03:33993873:A:G	3	33993873	1.57e-09	MLM
Soyasaponin aa	Chr03:40801060:C:T	3	40801060	2.07e-154	MLM
Soyasaponin aa	Chr03:45590605:A:G	3	45590605	4.47e-29	MLM
Soyasaponin aa	Chr03:4767605:C:T	3	4767605	7.76e-16	MLM
Soyasaponin aa	Chr03:5579278:C:T	3	5579278	3.49e-13	MLM
Soyasaponin aa	Chr03:5582080:C:T	3	5582080	3.72e-22	MLM
Soyasaponin aa	Chr03:6826604:A:G	3	6826604	5.26e-13	MLM
Soyasaponin aa	Chr03:6910808:C:G	3	6910808	5.19e-44	MLM
Soyasaponin aa	Chr04:11198097:A:G	4	11198097	1.39e-26	MLM
Soyasaponin aa	Chr04:15944532:G:T	4	15944532	1.07e-09	MLM
Soyasaponin aa	Chr04:18910902:C:T	4	18910902	5.05e-13	MLM
Soyasaponin aa	Chr04:44561782:C:T	4	44561782	1.07e-25	MLM
Soyasaponin aa	Chr04:9068697:C:T	4	9068697	1.16e-09	MLM
Soyasaponin aa	Chr05:11162323:A:C	5	11162323	1.21e-09	MLM
Soyasaponin aa	Chr05:1636220:C:T	5	1636220	1.53e-08	MLM
Soyasaponin aa	Chr05:17848142:A:G	5	17848142	5.01e-10	MLM
Soyasaponin aa	Chr05:26443902:A:G	5	26443902	1.86e-09	MLM
Soyasaponin aa	Chr06:14925596:A:C	6	14925596	2.7e-11	MLM
Soyasaponin aa	Chr06:14984595:A:G	6	14984595	4.5e-14	MLM
Soyasaponin aa	Chr06:14987134:A:G	6	14987134	8.47e-11	MLM
Soyasaponin aa	Chr06:20297010:A:G	6	20297010	1.65e-153	MLM
Soyasaponin aa	Chr06:48778746:A:T	6	48778746	2.38e-13	MLM
Soyasaponin aa	Chr06:48871327:C:T	6	48871327	1.89e-10	MLM
Soyasaponin aa	Chr06:51163310:C:T	6	51163310	4.16e-08	MLM
Soyasaponin aa	Chr07:19391025:A:T	7	19391025	1.94e-12	MLM
Soyasaponin aa	Chr07:3028106:G:T	7	3028106	2.83e-09	MLM
Soyasaponin aa	Chr07:40097038:C:T	7	40097038	5.48e-22	MLM
Soyasaponin aa	Chr07:41576567:C:T	7	41576567	5.48e-22	MLM
Soyasaponin aa	Chr07:42511681:C:G	7	42511681	4.02e-08	MLM
Soyasaponin aa	Chr07:42519374:A:C	7	42519374	6.88e-09	MLM
Soyasaponin aa	Chr07:42567597:A:C	7	42567597	3.92e-12	MLM
Soyasaponin aa	Chr07:42578612:A:T	7	42578612	5.76e-10	MLM
Soyasaponin aa	Chr07:42724311:A:G	7	42724311	4.71e-09	MLM
Soyasaponin aa	Chr07:42773082:C:T	7	42773082	3.35e-08	MLM
Soyasaponin aa	Chr07:42815305:C:G	7	42815305	4.06e-08	MLM
Soyasaponin aa	Chr07:42838908:A:G	7	42838908	4.9e-09	MLM
Soyasaponin aa	Chr07:42890068:C:T	7	42890068	2.04e-11	MLM
Soyasaponin aa	Chr07:42905799:A:G	7	42905799	2.65e-10	MLM
Soyasaponin aa	Chr07:42911282:A:G	7	42911282	8.71e-10	MLM
Soyasaponin aa	Chr07:42912328:C:T	7	42912328	1.31e-08	MLM
Soyasaponin aa	Chr07:42922868:C:G	7	42922868	8.42e-10	MLM
Soyasaponin aa	Chr07:42931415:C:T	7	42931415	2.48e-08	MLM
Soyasaponin aa	Chr07:42933431:A:C	7	42933431	4.01e-10	MLM
Soyasaponin aa	Chr07:42938611:C:T	7	42938611	1.15e-15	MLM
Soyasaponin aa	Chr07:42940154:A:G	7	42940154	2.72e-08	MLM
Soyasaponin aa	Chr07:42942202:C:T	7	42942202	3.67e-14	MLM
Soyasaponin aa	Chr07:42949691:G:T	7	42949691	3.45e-14	MLM
Soyasaponin aa	Chr07:42956994:C:T	7	42956994	1.43e-08	MLM
Soyasaponin aa	Chr07:42957997:C:T	7	42957997	8.49e-13	MLM
Soyasaponin aa	Chr07:42974125:C:G	7	42974125	9.68e-14	MLM
Soyasaponin aa	Chr07:42990580:C:G	7	42990580	7.66e-14	MLM
Soyasaponin aa	Chr07:42999400:A:G	7	42999400	1.55e-10	MLM
Soyasaponin aa	Chr07:43000836:A:C	7	43000836	7.85e-13	MLM
Soyasaponin aa	Chr07:43011261:A:G	7	43011261	7.85e-10	MLM
Soyasaponin aa	Chr07:43012916:A:G	7	43012916	1.67e-13	MLM
Soyasaponin aa	Chr07:43018366:A:G	7	43018366	1.5e-14	MLM
Soyasaponin aa	Chr07:43029097:C:T	7	43029097	5.37e-17	MLM
Soyasaponin aa	Chr07:43043712:G:T	7	43043712	1.26e-14	MLM
Soyasaponin aa	Chr07:43053605:C:T	7	43053605	8.04e-17	MLM
Soyasaponin aa	Chr07:43062404:A:C	7	43062404	3.72e-18	MLM
Soyasaponin aa	Chr07:43069519:C:T	7	43069519	6.32e-15	MLM
Soyasaponin aa	Chr07:43113840:C:T	7	43113840	6.79e-24	MLM
Soyasaponin aa	Chr07:43123480:A:G	7	43123480	4.7e-24	MLM
Soyasaponin aa	Chr07:43128249:A:G	7	43128249	3.83e-24	MLM
Soyasaponin aa	Chr07:43134737:A:G	7	43134737	3.43e-29	MLM
Soyasaponin aa	Chr07:43148354:C:T	7	43148354	2.43e-27	MLM
Soyasaponin aa	Chr07:43154607:A:T	7	43154607	1.31e-19	MLM
Soyasaponin aa	Chr07:43162020:A:C	7	43162020	2.87e-23	MLM
Soyasaponin aa	Chr07:43172167:C:G	7	43172167	7.23e-23	MLM
Soyasaponin aa	Chr07:43180638:A:G	7	43180638	6.77e-22	MLM
Soyasaponin aa	Chr07:43184479:C:T	7	43184479	1.95e-20	MLM
Soyasaponin aa	Chr07:43188260:A:C	7	43188260	2.3e-23	MLM
Soyasaponin aa	Chr07:43197203:A:T	7	43197203	1.87e-22	MLM
Soyasaponin aa	Chr07:43203353:A:C	7	43203353	6.06e-23	MLM
Soyasaponin aa	Chr07:43217800:A:G	7	43217800	9.22e-23	MLM
Soyasaponin aa	Chr07:43238197:C:T	7	43238197	8.73e-13	MLM
Soyasaponin aa	Chr07:43257567:A:T	7	43257567	9.37e-11	MLM
Soyasaponin aa	Chr07:43354699:C:T	7	43354699	3.16e-11	MLM
Soyasaponin aa	Chr07:43377206:A:G	7	43377206	3.37e-10	MLM
Soyasaponin aa	Chr07:43457345:A:G	7	43457345	3.13e-10	MLM
Soyasaponin aa	Chr07:43475679:A:G	7	43475679	1.49e-11	MLM
Soyasaponin aa	Chr07:43481362:C:T	7	43481362	5.07e-10	MLM
Soyasaponin aa	Chr07:43484517:C:T	7	43484517	3.53e-10	MLM
Soyasaponin aa	Chr07:5262682:A:G	7	5262682	1.84e-121	MLM
Soyasaponin aa	Chr07:5318591:G:T	7	5318591	3.56e-14	MLM
Soyasaponin aa	Chr07:6277926:C:T	7	6277926	1.16e-12	MLM
Soyasaponin aa	Chr08:10336775:A:G	8	10336775	8.55e-11	MLM
Soyasaponin aa	Chr08:17058987:A:G	8	17058987	7.99e-11	MLM
Soyasaponin aa	Chr08:17993453:A:G	8	17993453	7.95e-09	MLM
Soyasaponin aa	Chr08:20652607:C:T	8	20652607	2.08e-29	MLM
Soyasaponin aa	Chr08:20738344:A:G	8	20738344	2.72e-23	MLM
Soyasaponin aa	Chr08:31682093:A:G	8	31682093	9.37e-136	MLM
Soyasaponin aa	Chr09:24623466:C:T	9	24623466	3.52e-11	MLM
Soyasaponin aa	Chr09:37165553:A:G	9	37165553	2.4e-08	MLM
Soyasaponin aa	Chr09:39865010:A:G	9	39865010	4.44e-11	MLM
Soyasaponin aa	Chr09:40036492:C:T	9	40036492	2.89e-08	MLM
Soyasaponin aa	Chr09:4266014:A:T	9	4266014	1.1e-11	MLM
Soyasaponin aa	Chr09:4360615:C:T	9	4360615	2.45e-20	MLM
Soyasaponin aa	Chr09:6417325:A:G	9	6417325	6.99e-16	MLM
Soyasaponin aa	Chr09:7065994:C:T	9	7065994	2.98e-19	MLM
Soyasaponin aa	Chr09:7325464:A:G	9	7325464	2.83e-19	MLM
Soyasaponin aa	Chr09:9706966:A:T	9	9706966	8.25e-13	MLM
Soyasaponin aa	Chr10:10500449:C:T	10	10500449	3.78e-08	MLM
Soyasaponin aa	Chr10:11306333:G:T	10	11306333	7.39e-14	MLM
Soyasaponin aa	Chr10:2958670:C:G	10	2958670	5.91e-17	MLM
Soyasaponin aa	Chr10:41454739:A:G	10	41454739	3.52e-18	MLM
Soyasaponin aa	Chr10:6412559:C:T	10	6412559	6.99e-16	MLM
Soyasaponin aa	Chr10:8837400:A:G	10	8837400	7.33e-10	MLM
Soyasaponin aa	Chr11:14405373:A:C	11	14405373	2.81e-09	MLM
Soyasaponin aa	Chr11:22246852:C:T	11	22246852	1.28e-14	MLM
Soyasaponin aa	Chr11:22523997:A:G	11	22523997	4.1e-08	MLM
Soyasaponin aa	Chr11:24862897:A:T	11	24862897	9.36e-18	MLM
Soyasaponin aa	Chr11:29975343:A:G	11	29975343	1.49e-14	MLM
Soyasaponin aa	Chr11:31618892:A:G	11	31618892	3.42e-22	MLM
Soyasaponin aa	Chr11:31923859:C:T	11	31923859	2.53e-08	MLM
Soyasaponin aa	Chr12:13256517:A:C	12	13256517	3.36e-10	MLM
Soyasaponin aa	Chr12:14269596:A:G	12	14269596	6.99e-16	MLM
Soyasaponin aa	Chr12:19060883:C:T	12	19060883	6.99e-16	MLM
Soyasaponin aa	Chr12:20783163:A:G	12	20783163	6.99e-16	MLM
Soyasaponin aa	Chr12:20880222:C:T	12	20880222	6.99e-16	MLM
Soyasaponin aa	Chr12:23362127:A:G	12	23362127	3.3e-13	MLM
Soyasaponin aa	Chr12:2442972:A:G	12	2442972	1.17e-10	MLM
Soyasaponin aa	Chr12:33480039:C:T	12	33480039	1.65e-30	MLM
Soyasaponin aa	Chr12:35624792:A:G	12	35624792	4.73e-09	MLM
Soyasaponin aa	Chr12:9997087:A:T	12	9997087	6.99e-16	MLM
Soyasaponin aa	Chr13:14186538:A:G	13	14186538	2.16e-14	MLM
Soyasaponin aa	Chr13:17890287:C:T	13	17890287	1.35e-19	MLM
Soyasaponin aa	Chr13:19647941:A:G	13	19647941	1.62e-10	MLM
Soyasaponin aa	Chr13:25717219:A:G	13	25717219	2.56e-12	MLM
Soyasaponin aa	Chr13:29514868:C:T	13	29514868	7.36e-11	MLM
Soyasaponin aa	Chr13:31351563:C:G	13	31351563	2.37e-09	MLM
Soyasaponin aa	Chr14:17493746:A:G	14	17493746	6e-21	MLM
Soyasaponin aa	Chr14:43655064:A:G	14	43655064	3.67e-15	MLM
Soyasaponin aa	Chr14:43718904:G:T	14	43718904	1.38e-09	MLM
Soyasaponin aa	Chr14:48456606:A:T	14	48456606	3.77e-08	MLM
Soyasaponin aa	Chr14:6683421:A:G	14	6683421	3.34e-11	MLM
Soyasaponin aa	Chr14:8356518:A:T	14	8356518	5.48e-22	MLM
Soyasaponin aa	Chr14:8384230:C:T	14	8384230	5.48e-22	MLM
Soyasaponin aa	Chr15:10539388:C:G	15	10539388	5.48e-22	MLM
Soyasaponin aa	Chr15:12727596:A:G	15	12727596	0	MLM
Soyasaponin aa	Chr15:15810524:A:T	15	15810524	6.31e-23	MLM
Soyasaponin aa	Chr15:16954454:C:T	15	16954454	1.07e-12	MLM
Soyasaponin aa	Chr15:18773353:A:G	15	18773353	1.27e-09	MLM
Soyasaponin aa	Chr15:19347007:A:T	15	19347007	3.52e-09	MLM
Soyasaponin aa	Chr15:22073214:C:G	15	22073214	1.54e-08	MLM
Soyasaponin aa	Chr15:26228185:C:T	15	26228185	7.94e-13	MLM
Soyasaponin aa	Chr15:34948933:C:G	15	34948933	1.2e-08	MLM
Soyasaponin aa	Chr15:3541523:A:G	15	3541523	1.67e-12	MLM
Soyasaponin aa	Chr15:44056763:A:T	15	44056763	6.99e-16	MLM
Soyasaponin aa	Chr15:48946117:C:T	15	48946117	1.35e-11	MLM
Soyasaponin aa	Chr15:49032215:A:G	15	49032215	2.01e-17	MLM
Soyasaponin aa	Chr16:10055759:C:T	16	10055759	1.05e-52	MLM
Soyasaponin aa	Chr16:19044366:A:G	16	19044366	1.32e-09	MLM
Soyasaponin aa	Chr16:19373688:C:T	16	19373688	2.93e-15	MLM
Soyasaponin aa	Chr16:19439542:G:T	16	19439542	5.98e-10	MLM
Soyasaponin aa	Chr16:27140774:A:C	16	27140774	5.42e-09	MLM
Soyasaponin aa	Chr16:27332161:A:G	16	27332161	7.63e-11	MLM
Soyasaponin aa	Chr16:27388386:A:C	16	27388386	1.26e-36	MLM
Soyasaponin aa	Chr16:28470207:A:C	16	28470207	8.77e-15	MLM
Soyasaponin aa	Chr16:30843490:C:T	16	30843490	6.83e-29	MLM
Soyasaponin aa	Chr16:36228836:C:T	16	36228836	2.31e-27	MLM
Soyasaponin aa	Chr16:36244907:A:T	16	36244907	1.71e-10	MLM
Soyasaponin aa	Chr16:36546035:A:G	16	36546035	9.17e-15	MLM
Soyasaponin aa	Chr16:36720954:A:T	16	36720954	2.43e-17	MLM
Soyasaponin aa	Chr17:14883521:A:G	17	14883521	3.36e-13	MLM
Soyasaponin aa	Chr17:16579008:C:T	17	16579008	3.81e-09	MLM
Soyasaponin aa	Chr17:23208735:A:G	17	23208735	4.08e-13	MLM
Soyasaponin aa	Chr17:23211183:C:T	17	23211183	2.64e-08	MLM
Soyasaponin aa	Chr17:31800544:C:T	17	31800544	8e-24	MLM
Soyasaponin aa	Chr17:33161424:A:G	17	33161424	7.71e-10	MLM
Soyasaponin aa	Chr17:37102956:A:G	17	37102956	1.17e-12	MLM
Soyasaponin aa	Chr18:23009945:C:T	18	23009945	2.92e-09	MLM
Soyasaponin aa	Chr18:35094199:A:T	18	35094199	9.36e-18	MLM
Soyasaponin aa	Chr18:42988298:C:T	18	42988298	2.29e-08	MLM
Soyasaponin aa	Chr18:43403263:A:C	18	43403263	1.69e-08	MLM
Soyasaponin aa	Chr18:44067495:C:T	18	44067495	5.89e-09	MLM
Soyasaponin aa	Chr18:49352359:G:T	18	49352359	7.81e-09	MLM
Soyasaponin aa	Chr18:49819968:A:C	18	49819968	3.48e-08	MLM
Soyasaponin aa	Chr18:51815498:C:T	18	51815498	2.81e-08	MLM
Soyasaponin aa	Chr18:54774409:C:G	18	54774409	9.1e-24	MLM
Soyasaponin aa	Chr18:56501442:C:T	18	56501442	6.99e-16	MLM
Soyasaponin aa	Chr18:57172126:A:G	18	57172126	5.73e-09	MLM
Soyasaponin aa	Chr18:7034029:C:T	18	7034029	5.5e-28	MLM
Soyasaponin aa	Chr19:1578700:A:T	19	1578700	5.18e-09	MLM
Soyasaponin aa	Chr19:23846015:G:T	19	23846015	1.96e-08	MLM
Soyasaponin aa	Chr19:24515865:A:T	19	24515865	3.59e-10	MLM
Soyasaponin aa	Chr19:25468648:C:T	19	25468648	9.36e-18	MLM
Soyasaponin aa	Chr19:33661568:A:C	19	33661568	1.33e-53	MLM
Soyasaponin aa	Chr19:38255382:C:T	19	38255382	9.17e-12	MLM
Soyasaponin aa	Chr19:38783057:A:C	19	38783057	3.44e-08	MLM
Soyasaponin aa	Chr19:39137873:C:T	19	39137873	2.19e-10	MLM
Soyasaponin aa	Chr19:39299944:A:C	19	39299944	6.81e-96	MLM
Soyasaponin aa	Chr19:4735156:A:T	19	4735156	5.09e-08	MLM
Soyasaponin aa	Chr19:47419218:C:T	19	47419218	1.41e-10	MLM
Soyasaponin aa	Chr20:12024250:A:G	20	12024250	1.59e-22	MLM
Soyasaponin aa	Chr20:33577063:A:G	20	33577063	1.19e-10	MLM
Soyasaponin aa	Chr20:33779254:C:G	20	33779254	2.87e-08	MLM
Soyasaponin aa	Chr20:33974547:C:T	20	33974547	4.42e-29	MLM
Soyasaponin aa	Chr20:35381290:A:G	20	35381290	1.36e-20	MLM
Soyasaponin aa	Chr20:35495667:A:G	20	35495667	5.48e-22	MLM
Soyasaponin aa	Chr20:37740843:A:C	20	37740843	1.63e-21	MLM
Soyasaponin aa	Chr20:44707632:C:T	20	44707632	6.14e-10	MLM
Soyasaponin aa	Chr20:45173908:C:T	20	45173908	3.72e-22	MLM
Soyasaponin aa	Chr20:45390037:C:T	20	45390037	1.65e-10	MLM
Soyasaponin aa	Chr20:7773144:C:T	20	7773144	7.96e-14	MLM
Soyasaponin aa	Chr06:14918909:G:T	6	14918909	1.55e-13	MLMM
Soyasaponin aa	Chr07:40280651:A:G	7	40280651	1.84e-11	MLMM
Soyasaponin aa	Chr07:43134737:A:G	7	43134737	2.96e-66	MLMM
Soyasaponin aa	Chr11:14301944:A:G	11	14301944	5.41e-15	MLMM
Soyasaponin aa	Chr18:55727097:A:G	18	55727097	7.79e-09	MLMM
Soyasaponin ab	Chr07:39796478:C:T	7	39796478	3.89e-11	Blink
Soyasaponin ab	Chr07:43134737:A:G	7	43134737	5.12e-24	Blink
Soyasaponin ab	Chr17:15310650:C:T	17	15310650	2.95e-17	Blink
Soyasaponin ab	Chr19:34249755:A:G	19	34249755	3.33e-08	Blink
Soyasaponin ab	Chr01:3958932:A:G	1	3958932	8.92e-09	FarmCPU
Soyasaponin ab	Chr07:37330290:A:G	7	37330290	8.54e-09	FarmCPU
Soyasaponin ab	Chr07:37524200:C:T	7	37524200	2.16e-08	FarmCPU
Soyasaponin ab	Chr07:38685252:C:T	7	38685252	4.17e-08	FarmCPU
Soyasaponin ab	Chr07:39393415:A:G	7	39393415	1.84e-08	FarmCPU
Soyasaponin ab	Chr07:42218290:A:G	7	42218290	2.95e-08	FarmCPU
Soyasaponin ab	Chr07:42462477:C:G	7	42462477	2.51e-08	FarmCPU
Soyasaponin ab	Chr07:42519374:A:C	7	42519374	9.3e-18	FarmCPU
Soyasaponin ab	Chr07:43129404:A:C	7	43129404	2.27e-09	FarmCPU
Soyasaponin ab	Chr07:43134737:A:G	7	43134737	3.67e-49	FarmCPU
Soyasaponin ab	Chr07:43148354:C:T	7	43148354	1.97e-51	FarmCPU
Soyasaponin ab	Chr07:43354699:C:T	7	43354699	3.95e-15	FarmCPU
Soyasaponin ab	Chr07:43377339:A:T	7	43377339	1.22e-08	FarmCPU
Soyasaponin ab	Chr08:23275190:A:G	8	23275190	3.08e-08	FarmCPU
Soyasaponin ab	Chr08:26747949:A:G	8	26747949	1.65e-08	FarmCPU
Soyasaponin ab	Chr08:29825856:A:G	8	29825856	1.8e-08	FarmCPU
Soyasaponin ab	Chr12:20023021:A:T	12	20023021	3.98e-08	FarmCPU
Soyasaponin ab	Chr12:38064181:A:G	12	38064181	2.74e-08	FarmCPU
Soyasaponin ab	Chr13:5473457:C:T	13	5473457	4.71e-08	FarmCPU
Soyasaponin ab	Chr14:401003:C:T	14	401003	6.64e-09	FarmCPU
Soyasaponin ab	Chr14:402436:C:T	14	402436	3.85e-09	FarmCPU
Soyasaponin ab	Chr16:37767547:A:T	16	37767547	3.04e-08	FarmCPU
Soyasaponin ab	Chr18:16495840:C:T	18	16495840	9.95e-09	FarmCPU
Soyasaponin ab	Chr18:17498241:C:T	18	17498241	2.05e-08	FarmCPU
Soyasaponin ab	Chr18:2120359:C:T	18	2120359	3.75e-09	FarmCPU
Soyasaponin ab	Chr18:4829576:A:G	18	4829576	5.76e-09	FarmCPU
Soyasaponin ab	Chr07:42015087:A:T	7	42015087	1.43e-12	MLMM
Soyasaponin ab	Chr07:43134737:A:G	7	43134737	2.16e-60	MLMM
Soyasaponin ab	Chr13:30467589:A:C	13	30467589	1.32e-08	MLMM
Soyasaponin ab	Chr16:9947997:A:G	16	9947997	4.81e-08	MLMM
Soyasaponin ab	Chr18:4976093:C:T	18	4976093	3.44e-11	MLMM
Soyasaponin ba	Chr18:1763059:A:T	18	1763059	1.91e-08	Blink
Soyasaponin ba	Chr01:18956893:C:T	1	18956893	1.17e-09	FarmCPU
Soyasaponin ba	Chr01:334261:A:G	1	334261	1.17e-09	FarmCPU
Soyasaponin ba	Chr01:4677203:C:G	1	4677203	1.17e-09	FarmCPU
Soyasaponin ba	Chr09:2056947:C:T	9	2056947	1.17e-09	FarmCPU
Soyasaponin ba	Chr18:53762586:A:G	18	53762586	1.17e-09	FarmCPU
Soyasaponin ba	Chr01:1307083:C:T	1	1307083	7.71e-11	MLM
Soyasaponin ba	Chr01:44442519:A:G	1	44442519	8.27e-19	MLM
Soyasaponin ba	Chr01:45473078:C:T	1	45473078	1.08e-27	MLM
Soyasaponin ba	Chr01:5345147:A:G	1	5345147	3.62e-14	MLM
Soyasaponin ba	Chr01:5905557:C:T	1	5905557	1.33e-29	MLM
Soyasaponin ba	Chr01:6139393:A:C	1	6139393	4.91e-13	MLM
Soyasaponin ba	Chr01:7483008:A:G	1	7483008	1.7e-19	MLM
Soyasaponin ba	Chr01:9214045:C:T	1	9214045	2.5e-08	MLM
Soyasaponin ba	Chr02:21997969:C:T	2	21997969	4.89e-18	MLM
Soyasaponin ba	Chr02:41429885:A:G	2	41429885	3.9e-08	MLM
Soyasaponin ba	Chr02:651308:C:T	2	651308	3.86e-11	MLM
Soyasaponin ba	Chr02:7469171:C:G	2	7469171	2.88e-40	MLM
Soyasaponin ba	Chr02:9069399:A:G	2	9069399	1.09e-53	MLM
Soyasaponin ba	Chr03:2548089:C:T	3	2548089	1.75e-25	MLM
Soyasaponin ba	Chr03:2585402:C:T	3	2585402	1.03e-08	MLM
Soyasaponin ba	Chr03:2971302:A:G	3	2971302	3.77e-18	MLM
Soyasaponin ba	Chr03:5186865:A:G	3	5186865	1.95e-12	MLM
Soyasaponin ba	Chr03:5694595:C:G	3	5694595	2.95e-09	MLM
Soyasaponin ba	Chr03:6002724:C:T	3	6002724	2.94e-100	MLM
Soyasaponin ba	Chr03:8296186:C:T	3	8296186	4.47e-20	MLM
Soyasaponin ba	Chr04:15551807:A:G	4	15551807	2.79e-08	MLM
Soyasaponin ba	Chr04:32989164:A:G	4	32989164	6.78e-11	MLM
Soyasaponin ba	Chr04:42165889:C:T	4	42165889	3.56e-08	MLM
Soyasaponin ba	Chr04:45581435:A:T	4	45581435	4.94e-36	MLM
Soyasaponin ba	Chr04:45586457:C:T	4	45586457	1e-08	MLM
Soyasaponin ba	Chr04:4756337:C:T	4	4756337	2.43e-22	MLM
Soyasaponin ba	Chr04:51716642:A:C	4	51716642	1.3e-10	MLM
Soyasaponin ba	Chr05:10881076:C:T	5	10881076	1.03e-08	MLM
Soyasaponin ba	Chr05:11992438:C:T	5	11992438	4.04e-13	MLM
Soyasaponin ba	Chr05:1763995:A:T	5	1763995	8.8e-14	MLM
Soyasaponin ba	Chr05:17925571:A:G	5	17925571	1.16e-29	MLM
Soyasaponin ba	Chr05:17990563:C:T	5	17990563	1.03e-08	MLM
Soyasaponin ba	Chr05:25765291:C:T	5	25765291	6.65e-13	MLM
Soyasaponin ba	Chr05:26400253:G:T	5	26400253	6.67e-11	MLM
Soyasaponin ba	Chr05:38911736:C:T	5	38911736	1.12e-10	MLM
Soyasaponin ba	Chr06:14041568:C:T	6	14041568	5.12e-21	MLM
Soyasaponin ba	Chr06:16419697:C:T	6	16419697	1.17e-12	MLM
Soyasaponin ba	Chr06:3871391:A:T	6	3871391	4.34e-15	MLM
Soyasaponin ba	Chr06:43547366:A:G	6	43547366	2.11e-10	MLM
Soyasaponin ba	Chr06:43673158:A:C	6	43673158	3.57e-29	MLM
Soyasaponin ba	Chr06:44724752:C:G	6	44724752	7.17e-25	MLM
Soyasaponin ba	Chr06:48724307:G:T	6	48724307	9.77e-26	MLM
Soyasaponin ba	Chr06:50369389:C:T	6	50369389	1.03e-08	MLM
Soyasaponin ba	Chr07:14789512:A:G	7	14789512	7.49e-12	MLM
Soyasaponin ba	Chr07:17263308:A:C	7	17263308	1.15e-22	MLM
Soyasaponin ba	Chr07:17339663:C:T	7	17339663	2.07e-11	MLM
Soyasaponin ba	Chr07:17401224:A:G	7	17401224	3.37e-16	MLM
Soyasaponin ba	Chr07:17738790:A:G	7	17738790	1.36e-19	MLM
Soyasaponin ba	Chr07:19080567:A:C	7	19080567	1.08e-08	MLM
Soyasaponin ba	Chr07:20125290:C:T	7	20125290	2.07e-11	MLM
Soyasaponin ba	Chr07:25199182:A:G	7	25199182	9.1e-22	MLM
Soyasaponin ba	Chr07:32995179:C:T	7	32995179	5.38e-11	MLM
Soyasaponin ba	Chr07:5212856:A:T	7	5212856	1.03e-08	MLM
Soyasaponin ba	Chr07:5283805:C:T	7	5283805	1.03e-08	MLM
Soyasaponin ba	Chr07:5383958:C:T	7	5383958	1.13e-09	MLM
Soyasaponin ba	Chr07:6799198:A:G	7	6799198	1.47e-26	MLM
Soyasaponin ba	Chr07:9720553:A:G	7	9720553	1.38e-12	MLM
Soyasaponin ba	Chr08:13774801:A:G	8	13774801	7.57e-25	MLM
Soyasaponin ba	Chr08:21162934:A:G	8	21162934	3.66e-17	MLM
Soyasaponin ba	Chr08:39703009:A:G	8	39703009	3.53e-38	MLM
Soyasaponin ba	Chr08:4147391:C:T	8	4147391	8.32e-11	MLM
Soyasaponin ba	Chr08:4187564:A:G	8	4187564	3.09e-09	MLM
Soyasaponin ba	Chr08:4348893:C:T	8	4348893	1.03e-08	MLM
Soyasaponin ba	Chr09:11382886:A:G	9	11382886	4.01e-11	MLM
Soyasaponin ba	Chr09:18708298:A:T	9	18708298	1.87e-14	MLM
Soyasaponin ba	Chr09:20347011:C:T	9	20347011	2.37e-28	MLM
Soyasaponin ba	Chr09:2805896:C:T	9	2805896	9.9e-13	MLM
Soyasaponin ba	Chr09:29591977:A:G	9	29591977	1.2e-12	MLM
Soyasaponin ba	Chr09:31312508:C:T	9	31312508	3.42e-09	MLM
Soyasaponin ba	Chr09:31440224:A:G	9	31440224	4.64e-15	MLM
Soyasaponin ba	Chr09:35693126:C:T	9	35693126	1.01e-09	MLM
Soyasaponin ba	Chr09:35816547:C:T	9	35816547	1.49e-15	MLM
Soyasaponin ba	Chr09:36175393:C:T	9	36175393	1.31e-11	MLM
Soyasaponin ba	Chr09:39770719:C:T	9	39770719	3.71e-10	MLM
Soyasaponin ba	Chr09:3990230:G:T	9	3990230	2.31e-29	MLM
Soyasaponin ba	Chr09:6643419:A:G	9	6643419	8.41e-15	MLM
Soyasaponin ba	Chr09:7830530:A:G	9	7830530	2.78e-104	MLM
Soyasaponin ba	Chr10:19394732:C:T	10	19394732	1.17e-09	MLM
Soyasaponin ba	Chr10:36056221:A:T	10	36056221	3.47e-21	MLM
Soyasaponin ba	Chr10:38297036:C:T	10	38297036	6.99e-56	MLM
Soyasaponin ba	Chr10:40337275:A:G	10	40337275	1.13e-42	MLM
Soyasaponin ba	Chr10:46589882:C:G	10	46589882	2.11e-13	MLM
Soyasaponin ba	Chr10:49226576:A:T	10	49226576	7.26e-12	MLM
Soyasaponin ba	Chr11:14633167:C:T	11	14633167	2.17e-08	MLM
Soyasaponin ba	Chr11:22923893:C:T	11	22923893	4.94e-36	MLM
Soyasaponin ba	Chr11:30971209:C:T	11	30971209	1.25e-18	MLM
Soyasaponin ba	Chr11:6741957:C:T	11	6741957	9.29e-10	MLM
Soyasaponin ba	Chr12:11856823:A:G	12	11856823	2.13e-12	MLM
Soyasaponin ba	Chr12:16264597:C:T	12	16264597	6.43e-13	MLM
Soyasaponin ba	Chr12:20365242:C:T	12	20365242	5e-43	MLM
Soyasaponin ba	Chr12:20949907:C:T	12	20949907	8.65e-65	MLM
Soyasaponin ba	Chr12:21832794:C:T	12	21832794	1.56e-09	MLM
Soyasaponin ba	Chr12:21923388:G:T	12	21923388	8.65e-65	MLM
Soyasaponin ba	Chr12:26764182:C:T	12	26764182	3.06e-16	MLM
Soyasaponin ba	Chr12:27952181:A:T	12	27952181	9.04e-09	MLM
Soyasaponin ba	Chr12:29329650:A:G	12	29329650	2.54e-14	MLM
Soyasaponin ba	Chr12:30979133:C:T	12	30979133	9.37e-21	MLM
Soyasaponin ba	Chr12:31415650:A:T	12	31415650	2.62e-172	MLM
Soyasaponin ba	Chr12:37749235:C:T	12	37749235	1.38e-64	MLM
Soyasaponin ba	Chr12:872521:A:G	12	872521	2.18e-17	MLM
Soyasaponin ba	Chr13:10370987:A:G	13	10370987	2.46e-49	MLM
Soyasaponin ba	Chr13:10826513:A:T	13	10826513	5.38e-11	MLM
Soyasaponin ba	Chr13:14145662:C:T	13	14145662	1.46e-12	MLM
Soyasaponin ba	Chr13:14703927:G:T	13	14703927	2.7e-52	MLM
Soyasaponin ba	Chr13:15942149:A:G	13	15942149	9.18e-15	MLM
Soyasaponin ba	Chr13:19412897:A:G	13	19412897	1.16e-11	MLM
Soyasaponin ba	Chr13:19949557:A:G	13	19949557	8.32e-11	MLM
Soyasaponin ba	Chr13:20254891:C:T	13	20254891	8.57e-16	MLM
Soyasaponin ba	Chr13:20478348:A:G	13	20478348	1.04e-61	MLM
Soyasaponin ba	Chr13:20943485:A:G	13	20943485	2.78e-13	MLM
Soyasaponin ba	Chr13:22724447:C:T	13	22724447	2.85e-09	MLM
Soyasaponin ba	Chr13:30293206:A:G	13	30293206	2.13e-09	MLM
Soyasaponin ba	Chr13:31149780:C:T	13	31149780	6.83e-21	MLM
Soyasaponin ba	Chr13:35475808:A:G	13	35475808	1.42e-08	MLM
Soyasaponin ba	Chr13:37362494:A:G	13	37362494	8.66e-16	MLM
Soyasaponin ba	Chr13:39587533:A:C	13	39587533	6.78e-11	MLM
Soyasaponin ba	Chr13:40610567:C:T	13	40610567	2.59e-11	MLM
Soyasaponin ba	Chr13:44921821:C:T	13	44921821	1.91e-09	MLM
Soyasaponin ba	Chr14:11352931:A:T	14	11352931	2.17e-10	MLM
Soyasaponin ba	Chr14:11830950:G:T	14	11830950	2.53e-08	MLM
Soyasaponin ba	Chr14:12003588:G:T	14	12003588	2.18e-09	MLM
Soyasaponin ba	Chr14:12126388:A:C	14	12126388	1.28e-21	MLM
Soyasaponin ba	Chr14:12286030:G:T	14	12286030	1.1e-18	MLM
Soyasaponin ba	Chr14:12923611:A:G	14	12923611	4.15e-12	MLM
Soyasaponin ba	Chr14:17056411:A:G	14	17056411	6.99e-56	MLM
Soyasaponin ba	Chr14:17251467:A:G	14	17251467	1.82e-08	MLM
Soyasaponin ba	Chr14:2064072:A:T	14	2064072	3.56e-08	MLM
Soyasaponin ba	Chr14:23681702:A:G	14	23681702	4.12e-10	MLM
Soyasaponin ba	Chr14:32415025:C:T	14	32415025	1.34e-09	MLM
Soyasaponin ba	Chr14:35030289:A:G	14	35030289	2.39e-09	MLM
Soyasaponin ba	Chr14:3798917:A:T	14	3798917	4.36e-09	MLM
Soyasaponin ba	Chr14:43031546:A:C	14	43031546	1.33e-09	MLM
Soyasaponin ba	Chr14:4651340:A:T	14	4651340	3.42e-09	MLM
Soyasaponin ba	Chr15:10130455:A:T	15	10130455	4.34e-15	MLM
Soyasaponin ba	Chr15:11797277:C:T	15	11797277	4.92e-14	MLM
Soyasaponin ba	Chr15:14348689:C:T	15	14348689	2.56e-19	MLM
Soyasaponin ba	Chr15:22372631:A:T	15	22372631	3.26e-148	MLM
Soyasaponin ba	Chr15:223895:A:G	15	223895	3.53e-14	MLM
Soyasaponin ba	Chr15:22618655:A:G	15	22618655	7.31e-198	MLM
Soyasaponin ba	Chr15:32658117:A:T	15	32658117	1.61e-12	MLM
Soyasaponin ba	Chr15:33142236:C:T	15	33142236	1.06e-14	MLM
Soyasaponin ba	Chr15:37565162:A:G	15	37565162	1.08e-08	MLM
Soyasaponin ba	Chr15:43616527:C:T	15	43616527	6.39e-15	MLM
Soyasaponin ba	Chr15:49540657:A:C	15	49540657	3.7e-14	MLM
Soyasaponin ba	Chr16:11378825:A:G	16	11378825	1.56e-09	MLM
Soyasaponin ba	Chr16:19334916:C:T	16	19334916	2.32e-17	MLM
Soyasaponin ba	Chr16:22715368:A:G	16	22715368	4.91e-13	MLM
Soyasaponin ba	Chr16:22984281:A:G	16	22984281	9.13e-17	MLM
Soyasaponin ba	Chr16:23882996:A:T	16	23882996	1.65e-12	MLM
Soyasaponin ba	Chr16:26885988:C:T	16	26885988	1.68e-48	MLM
Soyasaponin ba	Chr16:4484003:C:T	16	4484003	8.21e-15	MLM
Soyasaponin ba	Chr16:7951460:A:G	16	7951460	1.65e-12	MLM
Soyasaponin ba	Chr17:10742557:A:C	17	10742557	1.78e-08	MLM
Soyasaponin ba	Chr17:14684534:A:G	17	14684534	5.42e-13	MLM
Soyasaponin ba	Chr17:18038185:C:T	17	18038185	4.47e-09	MLM
Soyasaponin ba	Chr17:18449149:A:G	17	18449149	1.14e-08	MLM
Soyasaponin ba	Chr17:19388366:C:T	17	19388366	1.41e-18	MLM
Soyasaponin ba	Chr17:20310860:C:T	17	20310860	1.07e-08	MLM
Soyasaponin ba	Chr17:23538493:A:G	17	23538493	1.58e-11	MLM
Soyasaponin ba	Chr17:33216036:A:G	17	33216036	3.01e-09	MLM
Soyasaponin ba	Chr17:34678858:A:T	17	34678858	6.39e-15	MLM
Soyasaponin ba	Chr17:34760725:C:T	17	34760725	6.39e-15	MLM
Soyasaponin ba	Chr17:34905340:C:T	17	34905340	3.56e-08	MLM
Soyasaponin ba	Chr17:35362663:A:G	17	35362663	5.86e-13	MLM
Soyasaponin ba	Chr17:37707848:A:G	17	37707848	2.02e-08	MLM
Soyasaponin ba	Chr17:41319746:A:G	17	41319746	3.97e-35	MLM
Soyasaponin ba	Chr17:4260673:A:G	17	4260673	1.09e-14	MLM
Soyasaponin ba	Chr17:634919:C:T	17	634919	2.83e-09	MLM
Soyasaponin ba	Chr17:7961232:A:G	17	7961232	5.13e-09	MLM
Soyasaponin ba	Chr18:10633611:A:G	18	10633611	2.51e-27	MLM
Soyasaponin ba	Chr18:16372974:A:C	18	16372974	2.39e-08	MLM
Soyasaponin ba	Chr18:3004440:C:T	18	3004440	2.39e-09	MLM
Soyasaponin ba	Chr18:3063826:A:T	18	3063826	2.74e-43	MLM
Soyasaponin ba	Chr18:36125481:A:T	18	36125481	1.42e-10	MLM
Soyasaponin ba	Chr18:39810333:C:T	18	39810333	4.21e-10	MLM
Soyasaponin ba	Chr18:45597397:A:T	18	45597397	1.06e-17	MLM
Soyasaponin ba	Chr18:45678022:A:G	18	45678022	2.94e-08	MLM
Soyasaponin ba	Chr18:45765691:A:G	18	45765691	1.83e-10	MLM
Soyasaponin ba	Chr18:46085672:A:G	18	46085672	4.27e-13	MLM
Soyasaponin ba	Chr18:47657275:A:T	18	47657275	1.1e-15	MLM
Soyasaponin ba	Chr18:48296495:C:T	18	48296495	2.53e-11	MLM
Soyasaponin ba	Chr18:48840068:A:T	18	48840068	6.39e-15	MLM
Soyasaponin ba	Chr18:49859657:C:T	18	49859657	1.2e-08	MLM
Soyasaponin ba	Chr18:49915298:C:T	18	49915298	2.3e-12	MLM
Soyasaponin ba	Chr18:50193771:C:T	18	50193771	1.31e-09	MLM
Soyasaponin ba	Chr18:51815498:C:T	18	51815498	7.85e-14	MLM
Soyasaponin ba	Chr18:55480168:C:G	18	55480168	2.51e-19	MLM
Soyasaponin ba	Chr18:56071526:A:T	18	56071526	1.06e-21	MLM
Soyasaponin ba	Chr19:13222488:A:G	19	13222488	1.4e-16	MLM
Soyasaponin ba	Chr19:33275203:A:G	19	33275203	1.07e-19	MLM
Soyasaponin ba	Chr19:39983356:C:T	19	39983356	2.24e-10	MLM
Soyasaponin ba	Chr19:43646117:A:T	19	43646117	1.13e-09	MLM
Soyasaponin ba	Chr19:46926896:A:G	19	46926896	5.61e-16	MLM
Soyasaponin ba	Chr19:47760435:C:T	19	47760435	1.96e-13	MLM
Soyasaponin ba	Chr19:5436973:G:T	19	5436973	2.01e-11	MLM
Soyasaponin ba	Chr20:1824734:C:T	20	1824734	1.02e-17	MLM
Soyasaponin ba	Chr20:22660848:A:G	20	22660848	6.68e-09	MLM
Soyasaponin ba	Chr20:27712184:A:G	20	27712184	2.89e-08	MLM
Soyasaponin ba	Chr20:34766345:C:T	20	34766345	1.14e-09	MLM
Soyasaponin ba	Chr20:36051501:C:T	20	36051501	1.24e-10	MLM
Soyasaponin ba	Chr20:37322653:A:G	20	37322653	6.43e-40	MLM
Soyasaponin ba	Chr20:37664653:C:T	20	37664653	2.37e-14	MLM
Soyasaponin ba	Chr20:44328853:A:T	20	44328853	6.39e-15	MLM
Soyasaponin ba	Chr20:45163206:G:T	20	45163206	1.79e-15	MLM
Soyasaponin ba	Chr20:46277083:C:G	20	46277083	1.35e-10	MLM
Soyasaponin ba	Chr20:4746841:A:G	20	4746841	8.32e-11	MLM
Soyasaponin bb	Chr01:109039:A:G	1	109039	8.95e-31	Blink
Soyasaponin bb	Chr01:43636837:A:G	1	43636837	1.42e-103	Blink
Soyasaponin bb	Chr01:46338092:A:G	1	46338092	1.42e-103	Blink
Soyasaponin bb	Chr01:46576239:A:G	1	46576239	1.42e-103	Blink
Soyasaponin bb	Chr01:53159832:A:G	1	53159832	1.42e-103	Blink
Soyasaponin bb	Chr01:54362744:C:G	1	54362744	1.42e-101	Blink
Soyasaponin bb	Chr01:56640022:A:G	1	56640022	4.99e-08	Blink
Soyasaponin bb	Chr01:6139393:A:C	1	6139393	1.42e-103	Blink
Soyasaponin bb	Chr02:1478218:C:T	2	1478218	1.42e-103	Blink
Soyasaponin bb	Chr02:38637916:A:G	2	38637916	2.37e-23	Blink
Soyasaponin bb	Chr03:16938940:A:G	3	16938940	9.08e-11	Blink
Soyasaponin bb	Chr03:19724310:A:G	3	19724310	4.14e-16	Blink
Soyasaponin bb	Chr03:36820713:A:G	3	36820713	1.42e-103	Blink
Soyasaponin bb	Chr03:5207067:G:T	3	5207067	1.33e-13	Blink
Soyasaponin bb	Chr03:6860341:G:T	3	6860341	1.42e-103	Blink
Soyasaponin bb	Chr03:7722503:C:T	3	7722503	1.42e-103	Blink
Soyasaponin bb	Chr04:50902189:A:G	4	50902189	2.58e-12	Blink
Soyasaponin bb	Chr04:9480704:A:G	4	9480704	1.42e-103	Blink
Soyasaponin bb	Chr05:29365256:A:G	5	29365256	1.53e-08	Blink
Soyasaponin bb	Chr05:30772931:A:G	5	30772931	1.42e-103	Blink
Soyasaponin bb	Chr06:45095056:A:T	6	45095056	1.42e-103	Blink
Soyasaponin bb	Chr06:5370450:A:G	6	5370450	7.3e-15	Blink
Soyasaponin bb	Chr07:2529757:C:T	7	2529757	1.42e-103	Blink
Soyasaponin bb	Chr08:21143936:C:G	8	21143936	1.42e-103	Blink
Soyasaponin bb	Chr08:22085176:C:T	8	22085176	1.42e-103	Blink
Soyasaponin bb	Chr09:38071335:C:T	9	38071335	1.42e-103	Blink
Soyasaponin bb	Chr12:36887939:A:G	12	36887939	1.42e-103	Blink
Soyasaponin bb	Chr13:19947866:A:G	13	19947866	1.42e-103	Blink
Soyasaponin bb	Chr13:26647541:A:G	13	26647541	1.42e-103	Blink
Soyasaponin bb	Chr13:30593763:C:T	13	30593763	1.42e-103	Blink
Soyasaponin bb	Chr13:32890555:G:T	13	32890555	1.42e-103	Blink
Soyasaponin bb	Chr14:43373445:C:T	14	43373445	2.07e-21	Blink
Soyasaponin bb	Chr15:47722699:A:T	15	47722699	1.42e-103	Blink
Soyasaponin bb	Chr15:47726379:A:T	15	47726379	1.42e-103	Blink
Soyasaponin bb	Chr16:36498652:C:T	16	36498652	1.42e-103	Blink
Soyasaponin bb	Chr16:36523179:C:T	16	36523179	1.33e-08	Blink
Soyasaponin bb	Chr18:42640000:C:T	18	42640000	7.07e-09	Blink
Soyasaponin bb	Chr18:42797542:G:T	18	42797542	1.42e-103	Blink
Soyasaponin bb	Chr18:43163430:G:T	18	43163430	1.42e-103	Blink
Soyasaponin bb	Chr18:43789188:C:T	18	43789188	1.42e-103	Blink
Soyasaponin bb	Chr18:44041712:C:G	18	44041712	1.42e-103	Blink
Soyasaponin bb	Chr18:44162082:C:T	18	44162082	1.42e-103	Blink
Soyasaponin bb	Chr18:44279683:A:G	18	44279683	1.42e-103	Blink
Soyasaponin bb	Chr18:47785202:A:G	18	47785202	1.42e-103	Blink
Soyasaponin bb	Chr18:47931614:A:G	18	47931614	1.42e-103	Blink
Soyasaponin bb	Chr18:49659211:A:G	18	49659211	1.42e-103	Blink
Soyasaponin bb	Chr19:38077439:A:G	19	38077439	1.42e-103	Blink
Soyasaponin bb	Chr20:8081607:A:G	20	8081607	1.42e-103	Blink
Soyasaponin bb	Chr01:54362744:C:G	1	54362744	4.16e-15	MLMM
Soyasaponin bb	Chr18:47689145:A:G	18	47689145	7.18e-14	MLMM
Soyasaponin bb prime	Chr01:2684941:G:T	1	2684941	3.19e-08	FarmCPU
Soyasaponin bb prime	Chr04:10528796:C:T	4	10528796	1.95e-08	FarmCPU
Soyasaponin bb prime	Chr06:21123937:C:T	6	21123937	3.34e-08	FarmCPU
Soyasaponin bb prime	Chr06:21148000:A:T	6	21148000	8.77e-11	FarmCPU
Soyasaponin bb prime	Chr07:28251948:A:G	7	28251948	5.39e-15	FarmCPU
Soyasaponin bb prime	Chr08:8800203:C:T	8	8800203	5.96e-16	FarmCPU
Soyasaponin bb prime	Chr10:22715559:A:G	10	22715559	1.67e-12	FarmCPU
Soyasaponin bb prime	Chr12:653287:C:T	12	653287	2.74e-12	FarmCPU
Soyasaponin bb prime	Chr16:1954861:A:G	16	1954861	6.49e-09	FarmCPU
Soyasaponin bb prime	Chr19:13630650:A:C	19	13630650	6.92e-09	FarmCPU
Soyasaponin bb prime	Chr03:5166039:A:G	3	5166039	1.12e-12	MLM
Soyasaponin bb prime	Chr05:14006007:A:G	5	14006007	2.25e-15	MLM
Soyasaponin bb prime	Chr05:33562895:A:T	5	33562895	1.63e-16	MLM
Soyasaponin bb prime	Chr05:38330280:C:T	5	38330280	1.12e-12	MLM
Soyasaponin bb prime	Chr05:9364875:A:G	5	9364875	6.99e-09	MLM
Soyasaponin bb prime	Chr06:15169789:A:G	6	15169789	9.34e-09	MLM
Soyasaponin bb prime	Chr10:46389180:C:T	10	46389180	3.88e-08	MLM
Soyasaponin bb prime	Chr11:12217043:A:G	11	12217043	1.06e-08	MLM
Soyasaponin bb prime	Chr12:36636479:G:T	12	36636479	1.33e-09	MLM
Soyasaponin bb prime	Chr13:24451417:A:T	13	24451417	9.01e-22	MLM
Soyasaponin bb prime	Chr16:11987216:C:T	16	11987216	1.59e-10	MLM
Soyasaponin bb prime	Chr16:5330485:C:T	16	5330485	4.54e-08	MLM
Soyasaponin bb prime	Chr18:10963157:C:T	18	10963157	4.28e-09	MLM
Soyasaponin bb prime	Chr18:34332217:C:T	18	34332217	4.81e-12	MLM
Soyasaponin bb prime	Chr18:47689145:A:G	18	47689145	1.12e-08	MLM
Soyasaponin bb prime	Chr19:3707189:A:G	19	3707189	1.28e-08	MLM
Soyasaponin bb prime	Chr20:38353839:A:G	20	38353839	1.12e-12	MLM
Soyasaponin bb prime	Chr06:21148000:A:T	6	21148000	1.51e-09	MLMM
Soyasaponin bb prime	Chr06:51218275:C:T	6	51218275	1.63e-09	MLMM
Soyasaponin total	Chr03:14589824:A:G	3	14589824	2.07e-08	Blink
Soyasaponin total	Chr07:43062404:A:C	7	43062404	3.56e-14	Blink
Soyasaponin total	Chr14:1243861:C:T	14	1243861	1.34e-08	Blink
Soyasaponin total	Chr14:2096021:A:G	14	2096021	1.29e-08	Blink
Soyasaponin total	Chr17:15310650:C:T	17	15310650	4.46e-18	Blink
Soyasaponin total	Chr05:30920948:A:G	5	30920948	1.1e-09	FarmCPU
Soyasaponin total	Chr06:5661942:G:T	6	5661942	3.16e-10	FarmCPU
Soyasaponin total	Chr07:43062404:A:C	7	43062404	4.6e-18	FarmCPU
Soyasaponin total	Chr07:43148354:C:T	7	43148354	2.1e-14	FarmCPU
Soyasaponin total	Chr09:40625004:C:G	9	40625004	1.31e-08	FarmCPU
Soyasaponin total	Chr13:30489988:C:T	13	30489988	2.73e-08	FarmCPU
Soyasaponin total	Chr14:1243861:C:T	14	1243861	1.7e-08	FarmCPU
Soyasaponin total	Chr17:15310650:C:T	17	15310650	3.73e-25	FarmCPU
Soyasaponin total	Chr01:48447979:C:T	1	48447979	1.26e-09	MLM
Soyasaponin total	Chr04:32989164:A:G	4	32989164	1.61e-16	MLM
Soyasaponin total	Chr07:1421106:C:T	7	1421106	4.9e-08	MLM
Soyasaponin total	Chr07:36012242:C:T	7	36012242	3.27e-08	MLM
Soyasaponin total	Chr07:43029097:C:T	7	43029097	6.93e-10	MLM
Soyasaponin total	Chr07:43043712:G:T	7	43043712	3.32e-09	MLM
Soyasaponin total	Chr07:43053605:C:T	7	43053605	2.31e-10	MLM
Soyasaponin total	Chr07:43062404:A:C	7	43062404	2.76e-10	MLM
Soyasaponin total	Chr07:43113840:C:T	7	43113840	3.63e-10	MLM
Soyasaponin total	Chr07:43123480:A:G	7	43123480	1.94e-10	MLM
Soyasaponin total	Chr07:43128249:A:G	7	43128249	5.03e-10	MLM
Soyasaponin total	Chr07:43134737:A:G	7	43134737	4.66e-12	MLM
Soyasaponin total	Chr07:43148354:C:T	7	43148354	4.3e-12	MLM
Soyasaponin total	Chr07:43154607:A:T	7	43154607	5.4e-10	MLM
Soyasaponin total	Chr07:43162020:A:C	7	43162020	9.59e-10	MLM
Soyasaponin total	Chr07:43172167:C:G	7	43172167	9.91e-11	MLM
Soyasaponin total	Chr07:43180638:A:G	7	43180638	8.31e-10	MLM
Soyasaponin total	Chr07:43184479:C:T	7	43184479	4.3e-09	MLM
Soyasaponin total	Chr07:43188260:A:C	7	43188260	9.25e-10	MLM
Soyasaponin total	Chr07:43197203:A:T	7	43197203	3.85e-10	MLM
Soyasaponin total	Chr07:43203353:A:C	7	43203353	1.02e-09	MLM
Soyasaponin total	Chr07:43217800:A:G	7	43217800	1.71e-09	MLM
Soyasaponin total	Chr11:21235522:A:G	11	21235522	1.3e-10	MLM
Soyasaponin total	Chr13:39587533:A:C	13	39587533	1.61e-16	MLM
Soyasaponin total	Chr18:45028234:A:G	18	45028234	1.44e-09	MLM
Soyasaponin total	Chr19:13461589:A:G	19	13461589	2.47e-14	MLM
Soyasaponin total	Chr19:40208819:A:G	19	40208819	1.84e-08	MLM
Soyasaponin total	Chr07:43148354:C:T	7	43148354	2.19e-12	MLMM
Soyasaponin total	Chr17:15310650:C:T	17	15310650	1.22e-10	MLMM
Soyasaponin total	Chr19:14990370:A:G	19	14990370	1.44e-09	MLMM

## Sheet: Table S4
Supplementary Table S4. Overlapping genomic loci between isoflavone and soyasaponin mGWAS.
Multi trait locus	CHR	Merged Block start	Merged Block end	True GWAS name	Block start	Block end	Supporting SNP	Model	P.value	block_start	block_end
chr_merge_1	1	3678263	6139393	Soyasaponin_ba_1_1	3678263	6139393	Chr01:4677203:C:G	FarmCPU	1.17e-09	3678263	5583655
							Chr01:5345147:A:G	MLM	3.62e-14	4347457	5583655
							Chr01:6139393:A:C	MLM	4.91e-13	5286692	6139393
							Chr01:5905557:C:T	MLM	1.33e-29	5498974	5905557
				Acetyl_daidzin_1_1	4742374	4742374	Chr01:4742374:A:C	FarmCPU	9.54e-19	4742374	4742374
							Chr01:4742374:A:C	MLM	2.02e-12	4742374	4742374
chr_merge_2	1	35102164	38246565	Acetyl_daidzin_1_4	35102164	37000839	Chr01:36009539:C:T	MLM	1.55e-09	35102164	37000839
							Chr01:35865390:A:G	FarmCPU	9.54e-19	35865390	35865390
				Glycitin_1_2	35119917	38246565	Chr01:36117212:A:G	FarmCPU	1.99e-08	35119917	37117096
							Chr01:37735698:A:T	Blink	8.11e-16	36752895	38246565
				Soyasaponin_aa_1_2	35870925	37000839	Chr01:36678490:A:C	Blink	2.51e-21	35870925	37000839
							Chr01:36084764:C:T	MLM	2.06e-08	35960769	36084764
chr_merge_3	4	87887	4225512	Acetyl_daidzin_4_1	87887	4225512	Chr04:376298:C:T	MLM	1.75e-14	87887	1372076
							Chr04:2240055:G:T	FarmCPU	9.54e-19	1349017	3234687
							Chr04:3236177:C:G	MLM	1.82e-10	2239771	4225512
				Malonyl_daidzin_4_1	1349017	3234687	Chr04:2240055:G:T	Blink	5.52e-09	1349017	3234687
							Chr04:2240055:G:T	FarmCPU	3.59e-08	1349017	3234687
chr_merge_4	4	35222713	40421262	Glycitin_4_1	35222713	40421262	Chr04:36181320:A:G	MLM	3.06e-11	35222713	37058733
							Chr04:37681298:A:G	MLMM	3.74e-35	36719334	38494262
							Chr04:37681298:A:G	Blink	2.07e-50	36719334	38494262
							Chr04:37681298:A:G	FarmCPU	5.77e-20	36719334	38494262
							Chr04:37681298:A:G	MLM	1.91e-13	36719334	38494262
							Chr04:38995245:G:T	MLM	1.3e-09	37995292	39994701
							Chr04:39432514:A:C	MLM	3.08e-08	38432540	40421262
				Acetyl_daidzin_4_2	37087005	37087005	Chr04:37087005:C:T	FarmCPU	9.54e-19	37087005	37087005
							Chr04:37087005:C:T	MLM	2.02e-12	37087005	37087005
chr_merge_5	7	37358480	44260461	Acetyl_daidzin_7_1	37358480	38892392	Chr07:37358480:A:G	FarmCPU	9.54e-17	37358480	38154923
							Chr07:38187424:A:G	MLM	4.92e-08	37448780	38892392
				Soyasaponin_ab_7_1	38395673	40795841	Chr07:39393415:A:G	FarmCPU	1.84e-08	38395673	40393112
							Chr07:39796478:C:T	Blink	3.89e-11	38798377	40795841
				Soyasaponin_aa_7_1	39280666	42124839	Chr07:40280651:A:G	MLMM	1.84e-11	39280666	41280542
							Chr07:40097038:C:T	MLM	5.48e-22	40097038	40097038
							Chr07:41576567:C:T	MLM	5.48e-22	41139278	41576567
							Chr07:42124839:A:C	Blink	2.51e-21	41211575	42124839
				Soyasaponin_ab_7_2	41015527	44129252	Chr07:42015087:A:T	MLMM	1.43e-12	41015527	43012622
							Chr07:43129404:A:C	FarmCPU	2.27e-09	42129788	44129252
							Chr07:43134737:A:G	Blink	5.12e-24	42401716	43553458
							Chr07:43134737:A:G	FarmCPU	3.67e-49	42401716	43553458
							Chr07:43148354:C:T	FarmCPU	1.97e-51	42401716	43553458
							Chr07:43134737:A:G	MLMM	2.16e-60	42401716	43553458
				Soyasaponin_aa_7_2	42272244	44260461	Chr07:43271899:C:T	Blink	6.27e-19	42272244	44260461
							Chr07:43062404:A:C	MLM	3.72e-18	42348734	43773076
							Chr07:43134737:A:G	MLM	3.43e-29	42401716	43553458
							Chr07:43148354:C:T	MLM	2.43e-27	42401716	43553458
							Chr07:43134737:A:G	MLMM	2.96e-66	42401716	43553458
							Chr07:43134737:A:G	Blink	2.51e-21	42401716	43553458
chr_merge_6	13	27172690	29784782	Malonyl_glycitin_13_1	27172690	29784782	Chr13:27845274:C:T	MLM	7.51e-10	27172690	28842664
							Chr13:28578286:C:T	MLMM	3.98e-12	27578452	29066014
							Chr13:28562762:C:T	MLM	8.81e-09	27578063	29066014
							Chr13:28578286:C:T	MLM	2.04e-10	27578452	29066014
							Chr13:28790951:A:G	MLM	1.7e-11	27795307	29784782
				Glycitin_13_3	27172690	29066014	Chr13:27845274:C:T	Blink	5.77e-27	27172690	28842664
							Chr13:27845274:C:T	MLM	1.23e-10	27172690	28842664
							Chr13:28578286:C:T	MLM	2.08e-08	27578452	29066014
chr_merge_7	15	17454177	20341457	Soyasaponin_aa_15_1	17454177	20341457	Chr15:17949582:C:T	Blink	3.85e-13	17454177	18946191
							Chr15:18773353:A:G	MLM	1.27e-09	17949582	19772658
							Chr15:19342069:A:G	Blink	5.36e-11	18398731	20341457
				Acetyl_daidzin_15_1	17949582	19722979	Chr15:18731695:A:G	FarmCPU	9.54e-19	17949582	19722979
							Chr15:18506708:C:T	MLM	5.16e-09	18506708	18506708
chr_merge_8	16	29976517	34985316	Malonyl_daidzin_16_1	29976517	31944614	Chr16:30950699:A:G	Blink	2.18e-08	29976517	31944614
							Chr16:30950699:A:G	FarmCPU	1.1e-12	29976517	31944614
							Chr16:30950699:A:G	MLM	5.71e-09	29976517	31944614
							Chr16:30950699:A:G	MLMM	6.39e-11	29976517	31944614
				Genistin_16_1	30310478	32893478	Chr16:30378466:A:G	MLM	2.48e-10	30310478	31329735
							Chr16:31930954:A:G	FarmCPU	4.37e-10	30942337	32893478
							Chr16:30676060:A:T	MLM	6.48e-11	30561521	30727694
				Glycitin_16_1	32085571	34985316	Chr16:32681087:G:T	MLM	4.06e-08	32085571	33646986
							Chr16:34129142:A:C	Blink	3.98e-14	33282191	34985316
							Chr16:34141604:A:G	MLM	3.06e-08	33282191	34970876
				Acetyl_daidzin_16_1	32966320	34457317	Chr16:33955844:C:G	FarmCPU	6.74e-09	32966320	34457317
							Chr16:33914105:G:T	MLM	3.21e-15	33099075	34385943
chr_merge_9	18	24064	5827277	Malonyl_glycitin_18_1	24064	5054348	Chr18:529017:A:T	MLM	3.84e-15	24064	1518137
							Chr18:2138965:A:C	MLMM	2.84e-16	1179573	3138150
							Chr18:965331:A:C	MLM	7.98e-09	24064	1961100
							Chr18:2138965:A:C	MLM	4.18e-22	1179573	3138150
							Chr18:4059639:G:T	MLM	2e-09	3066156	5054348
				Acetyl_daidzin_18_1	1179573	4827584	Chr18:2138965:A:C	MLM	9.56e-14	1179573	3138150
							Chr18:2885208:A:G	FarmCPU	1.48e-08	1891026	3879302
							Chr18:3828776:A:G	MLM	2.96e-08	2829171	4827584
				Soyasaponin_ab_18_1	3829796	5827277	Chr18:4829576:A:G	FarmCPU	5.76e-09	3829796	5827277
							Chr18:4976093:C:T	MLMM	3.44e-11	4976093	4976093

## Sheet: Table S5
Supplementary Table S5. Candidate gene prioritization for high-confidence GWAS loci for isoflavones.
Trait	CHR	Start position	End position	QTL info	GWAS info	Novel	# of genes	Candidate gene	function-related (known)	annotation	Arabi_ID	Arabi paper	seed expression	network
Glycitin_1_1	1	1151564	3136737	x	o	X	176	Glyma.01G017100	O	cinnamoyl-CoA reductase-like SNL6	AT2G23910	-	-	-
Acetyl_daidzin_1_1	1	4776728	4776728	x	x	O	0	regulatory element			-	0	-	-
Acetyl_daidzin_1_2	1	7379559	9153887	x	x	O	71	Glyma.01G062200			AT4G30000	0	O	-
Acetyl_daidzin_1_3	1	35102039	35400690	x	o	X	9	-			-	0	-	-
Acetyl_daidzin_1_4	1	37084434	39002247	x	o	X	44	Glyma.01G106000		GSTU4	AT3G09270	1	O	o
Glycitin_1_2	1	37102187	40272953	x	o	X	83	Glyma.01G106000		GSTU4	AT3G09270	1	O	o
Acetyl_daidzin_1_5	1	44627001	47079782	x	o	X	74	Glyma.01G123900		ethylene-overproduction protein 1	AT3G51770	1	O	-
Daidzin_2_1	2	2072	1021629	x	o	X	107	Glyma.02G005700		cryptochrome-2-like	AT1G04400	5	O	x
Acetyl_daidzin_2_1	2	2081770	4351106	x	o	X	244	Glyma.02G036400		F-box/kelch-repeat protein At1g23390	AT1G23390	1	O	x
Genistin_3_1	3	34685784	36188275	x	x	O	83	Glyma.03G113600		protein PIN-LIKES 3	AT1G76520	1	O	x
Acetyl_daidzin_4_1	4	102613	4228268	x	o	X	514	Glyma.04G008600		codeine O-demethylase-like	AT5G20400	1	O	o
Malonyl_daidzin_4_1	4	1360094	3232381	x	x	O	231	Glyma.04G018600		codeine O-demethylase-like	AT1G76250	1	O	x
Glycitin_4_1	4	38245152	43535685	o	o	X	92	Glyma.04G154800			AT2G28380	1	O	x
Acetyl_daidzin_4_2	4	40159999	40159999	x	x	O	0	regulatory element			-	0	-	-
Acetyl_daidzin_4_3	4	50369221	51942895	x	o	X	171	Glyma.04G205100		myb-related protein 308-like	AT4G38620	5	O	o
Acetyl_daidzin_5_1	5	2323887	3669054	x	o	X	144	Glyma.05G039400		protein MODIFIER OF SNC1 1	AT4G24680	1	O	x
Daidzin_5_1	5	6352772	6352772	o	x	X	0	regulatory element			-	0	-	-
Glycitin_6_1	6	33798456	34987489	o	o	X	9	Glyma.06G220700		cucumber peeling cupredoxin	AT5G20230	0	X	o
Genistin_7_1	7	5793574	9663954	o	o	X	379	Glyma.07G071000		transcription factor EGL1	AT1G63650	10	O	x
Genistin_7_2	7	15155977	19203808	o	o	X	297	Glyma.07G132600		expansin precursor	AT2G37640	2	O	x
Acetyl_daidzin_7_1	7	39960600	41454936	x	o	X	119	Glyma.07G214700	O	caffeoyl-CoA O-methyltransferase	AT4G34050	-	-	-
Acetyl_daidzin_9_1	9	575645	1801866	x	o	X	147	Glyma.09G012900		putative protein FAR1-RELATED SEQUENCE 10	AT5G28530	1	O	x
Glycitin_9_1	9	3748144	5262711	x	o	X	140	Glyma.09G049500		serine carboxypeptidase-like	AT3G10410	1	O	x
Malonyl_glycitin_11_1	11	7216826	8349576	x	o	X	146	Glyma.11G107100	O	MYBZ2	AT4G38620	-	-	-
Glycitin_12_1	12	16011985	19710153	x	o	X	96	Glyma.12G142900		uncharacterized protein LOC100527035	AT4G27280	1	O	x
Glycitin_13_1	13	737493	3115081	x	o	X	83	Glyma.13G004100		endoplasmic reticulum-Golgi intermediate compartment protein 3	AT3G22290	1	O	x
Glycitin_13_2	13	8948366	12236252	x	o	X	103	Glyma.13G032200		transcription repressor MYB5	AT3G13540	2	O	o
Acetyl_daidzin_13_1	13	18294854	19400226	x	x	O	58	Glyma.13G082300	O	FLS1	AT5G08640	-	-	-
Malonyl_glycitin_13_1	13	27464808	30069664	x	o	X	276	Glyma.13G173500	O	IFS2	AT5G06900	-	-	-
Glycitin_13_3	13	27464808	29360589	x	o	X	200	Glyma.13G173500	O	IFS2	AT5G06900	-	-	-
Daidzin_14_1	14	13304471	14610877	x	o	X	45	Glyma.14G112400		homeobox protein knotted-1-like 3 isoform X3	AT5G25220	1	O	x
Acetyl_daidzin_14_1	14	34588094	37346280	x	o	X	46	Glyma.14G120900		PIN6B	AT1G77110	1	O	x
Daidzin_14_2	14	26028573	27931767	x	o	X	35	-			-	0	-	-
Glycitin_15_1	15	2507071	3826697	x	o	X	172	Glyma.15G034900		uncharacterized protein LOC100819371	AT5G59050	1	O	x
Glycitin_15_2	15	5625881	6798928	x	o	X	152	Glyma.15G080000		IQD54	AT2G33990	1	O	o
Acetyl_daidzin_15_1	15	18044047	20603972	x	o	X	59	Glyma.15G184300		pectinesterase/pectinesterase inhibitor PPE8B	AT3G43270	1	O	o
Daidzin_15_1	15	45871306	47290779	x	o	X	75	-			-	0	-	-
Malonyl_daidzin_16_1	16	32011817	33961186	o	o	X	182	Glyma.16G150600	O	omega-hydroxypalmitate O-feruloyl transferase	AT1G65450	-	-	-
Genistin_16_1	16	32343891	34899840	x	x	O	257	Glyma.16G150600	O	omega-hydroxypalmitate O-feruloyl transferase	AT1G65450	-	-	-
Glycitin_16_1	16	34102176	37256487	o	o	X	260	Glyma.16G150600	O	omega-hydroxypalmitate O-feruloyl transferase	AT1G65450	-	-	-
Acetyl_daidzin_16_1	16	34972682	36559519	o	o	X	134	Glyma.16G150600	O	omega-hydroxypalmitate O-feruloyl transferase	AT1G65450	-	-	-
Glycitin_16_2	16	37458755	39282947	o	o	X	217	Glyma.16G196700		homeobox-leucine zipper protein ANTHOCYANINLESS 2 isoform X1	AT4G00730	2	O	x
Glycitin_17_1	17	2527132	4412130	x	o	X	235	Glyma.17G050500		MYB205	AT5G35550	18	O	o
Malonyl_glycitin_18_1	18	37193	5037405	x	o	X	573	Glyma.18G029000		LAX14	AT2G38120	3	O	x
Acetyl_daidzin_18_1	18	1192399	4811680	x	o	X	390	Glyma.18G040700		transcription factor MYB20	AT5G16600	1	O	o
Acetyl_daidzin_18_2	18	37125412	39536406	x	o	X	52	Glyma.18G159500		galacturonosyltransferase 8	AT3G25140	1	O	x
Glycitin_18_1	18	42852986	44514511	x	o	X	50	Glyma.18G173300		uncharacterized protein LOC102668111	AT3G24750	1	X	x
Daidzin_18_1	18	52583218	54390303	x	o	X	153	Glyma.18G220500	O	vestitone reductase	AT2G45400	-	-	-
Genistin_19_1	19	1654416	2641979	x	o	X	66	Glyma.19G018300		cytochrome P450 84A1	AT4G36220	9	X	x
Acetyl_daidzin_20_1	20	26361534	27740602	x	o	X	37	-			-	0	-	-
Genistin_20_1	20	37173252	38896694	x	x	O	184	Glyma.20G114200	O	cinnamate 4-hydroxylase	AT2G30490	-	-	-

## Sheet: Table S6
Supplementary Table S6. Candidate gene prioritization for high-confidence GWAS loci for soyasaponins.
Trait	CHR	Start position	End position	QTL info	GWAS info	Novel	# of genes	Candidate gene	function_related (known)	annotaiton	Arabi_ID	Arabi paper	seed expression	network
Soyasaponin_ba_1_1	1	3717379	6184375	x	x	O	164	Glyma.01G046300	o	SG-4	AT2G15480	1	O	-
Soyasaponin_aa_1_1	1	9732435	11733743	x	x	O	47	-		-	-	0	-	-
Soyasaponin_aa_1_2	1	37858141	39002247	x	x	O	25	-		-	-	0	-	-
Soyasaponin_bb_1_2	1	55262021	57889851	x	x	O	324	-		-	-	0	-	-
Soyasaponin_aa_2_1	2	5129100	6006984	x	x	O	111	-		-	-	0	-	-
Soyasaponin_aa_6_1	6	14895754	18895754	o	o	X	77	-		-	-	0	-	-
Soyasaponin_bb_prime_6_1	6	20073656	22091754	o	o	X	73	-		-	-	0	-	-
Soyasaponin_ab_7_1	7	40952516	43355664	x	x	O	162	Glyma.07G215500		abscisate beta-glucosyltransferase	AT2G15490	1	O	-
Soyasaponin_aa_7_1	7	41846545	44693877	x	x	O	216	Glyma.07G215500		abscisate beta-glucosyltransferase	AT2G15490	1	O	-
Soyasaponin_ab_7_2	7	43576147	46697037	x	o	X	381	Glyma.07G254600	o	GT4	AT2G36770	0	O	-
Soyasaponin_aa_7_2	7	44841284	46828247	x	o	X	269	Glyma.07G254600	o	GT4	AT2G36770	0	O	-
Soyasaponin_total_7_1	7	44918935	46341628	x	o	X	195	Glyma.07G254600	o	GT4	AT2G36770	0	O	-
Soyasaponin_aa_11_1	11	19118850	20844614	x	o	X	74	-		-	-	0	-	-
Soyasaponin_aa_12_1	12	2454363	2454363	x	x	O	0	regulatory element		-	-	0	-	-
Soyasaponin_total_14_1	14	1184604	2409027	x	x	O	165	-		-	-	0	-	-
Soyasaponin_aa_15_1	15	17501981	21220348	x	x	O	96	-		-	-	0	-	-
Soyasaponin_ab_18_1	18	3821927	5809190	x	x	O	191	Glyma.18G052400		taxadiene 5-alpha hydroxylase	AT5G36110	2	X	-
Soyasaponin_bb_18_1	18	49360685	51427731	x	x	O	107	Glyma.18G198400		LAX15	AT2G38120	1	O	-
Soyasaponin_total_17_1	17	15310313	15310313	x	x	O	0	regulatory element		-	-	0	-	-
